# Supplementary material for: N-cadherin inhibitor creates a microenvironment that protect TILs from immune checkpoints and Treg cells
Source: PubMed Central journal article supplement (PMC7949480; doi:10.1136/jitc-2020-002138), 2021-03-10

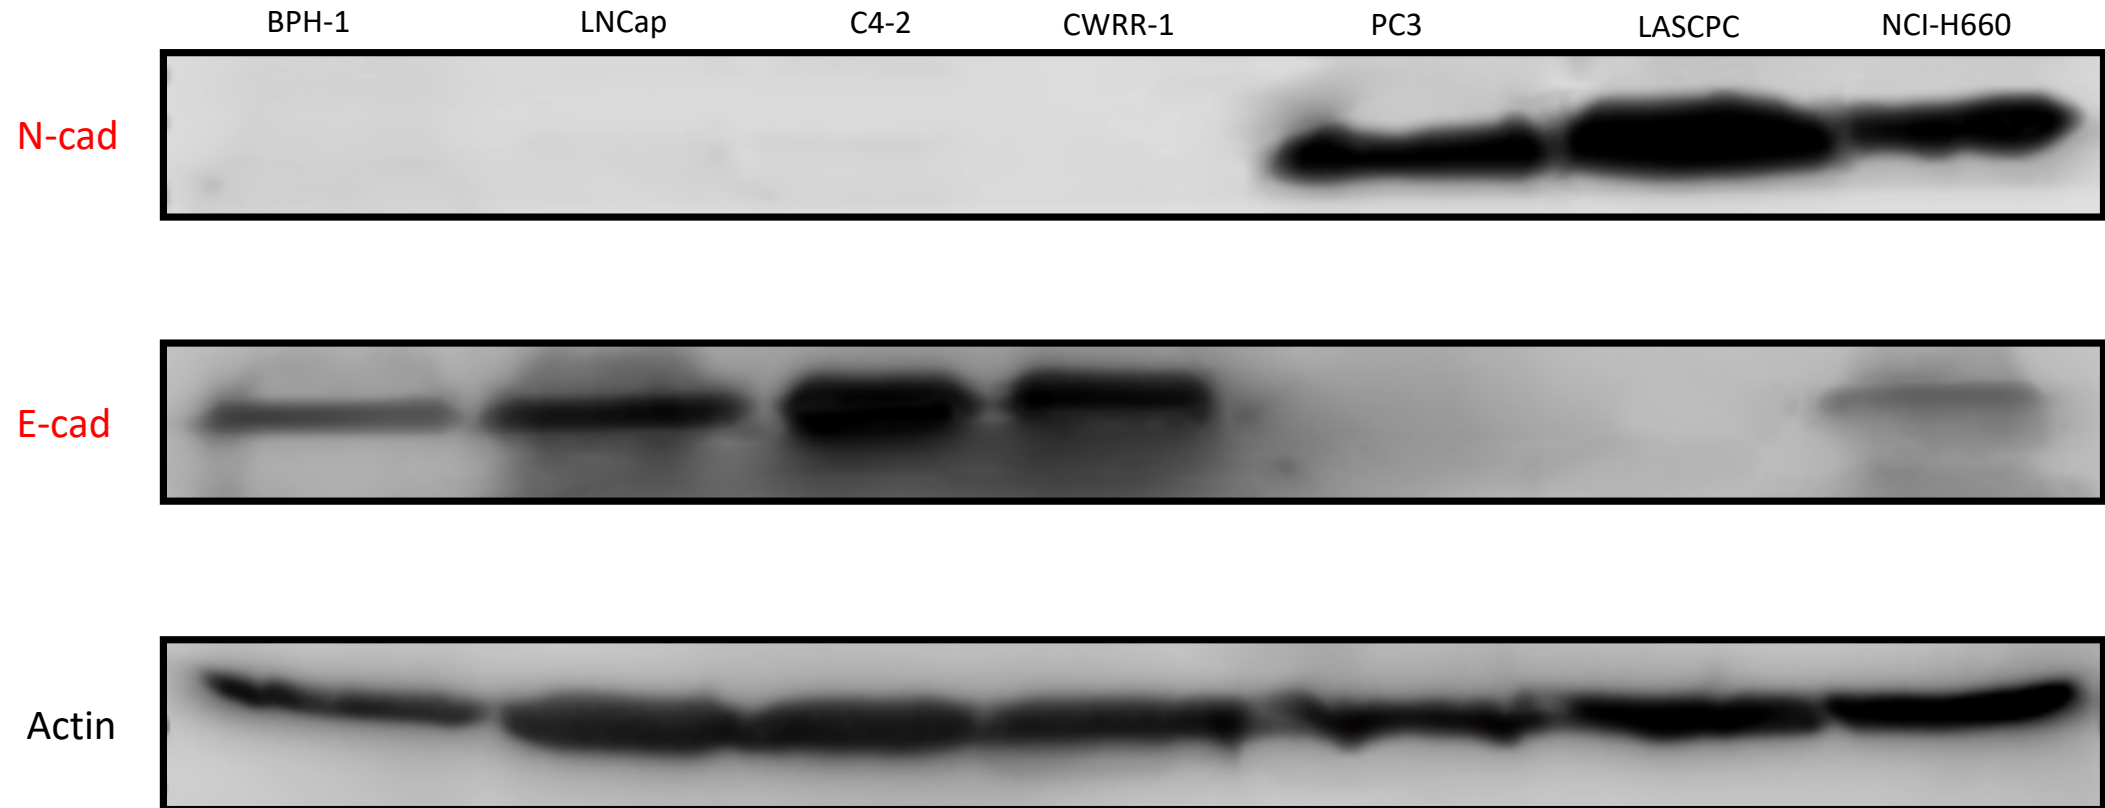

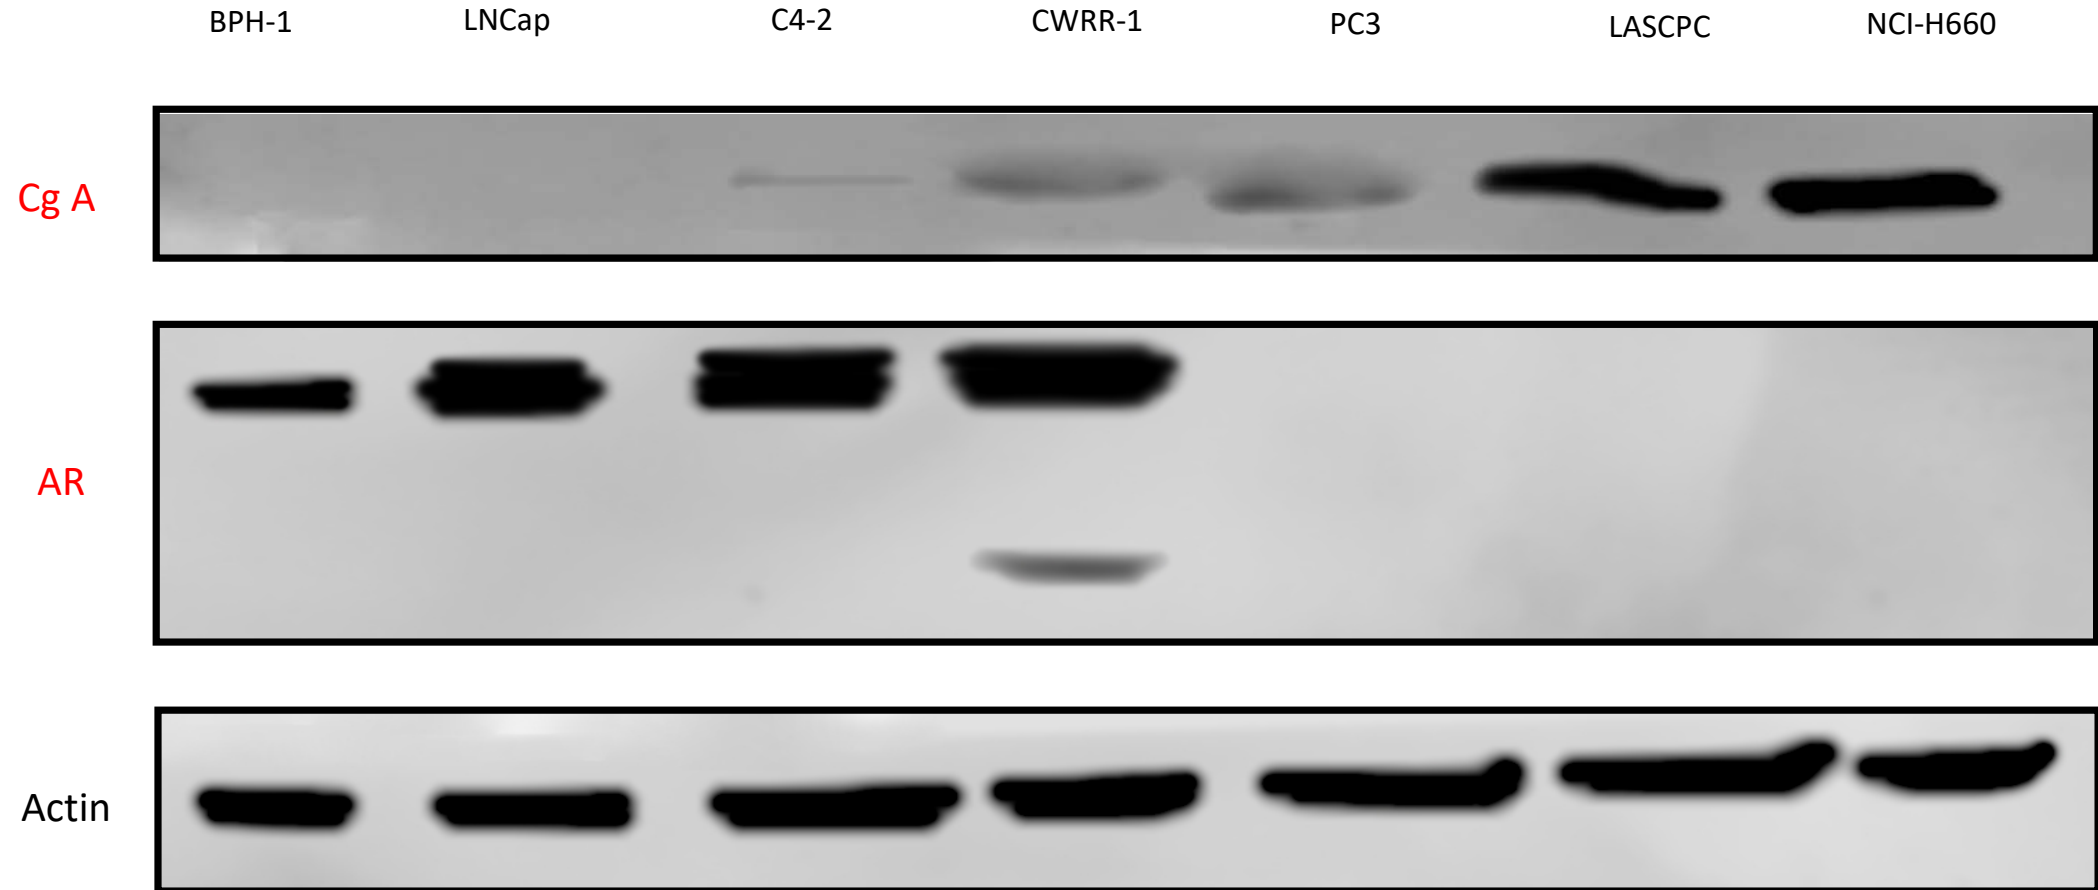

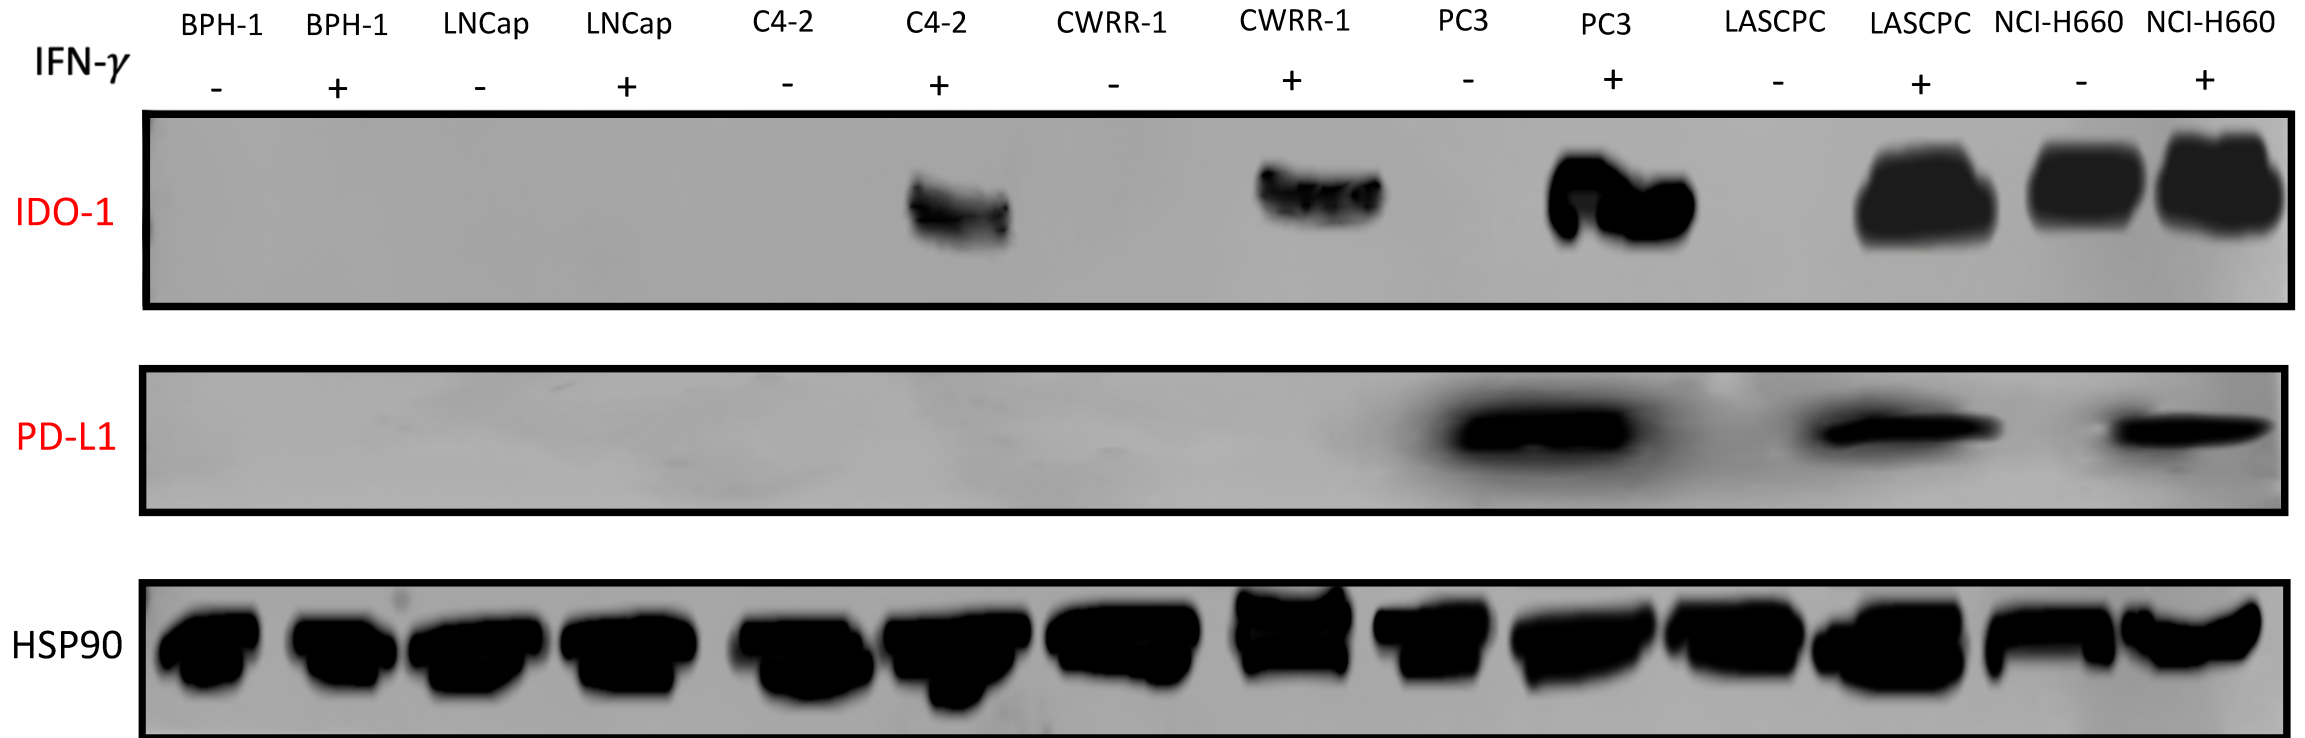

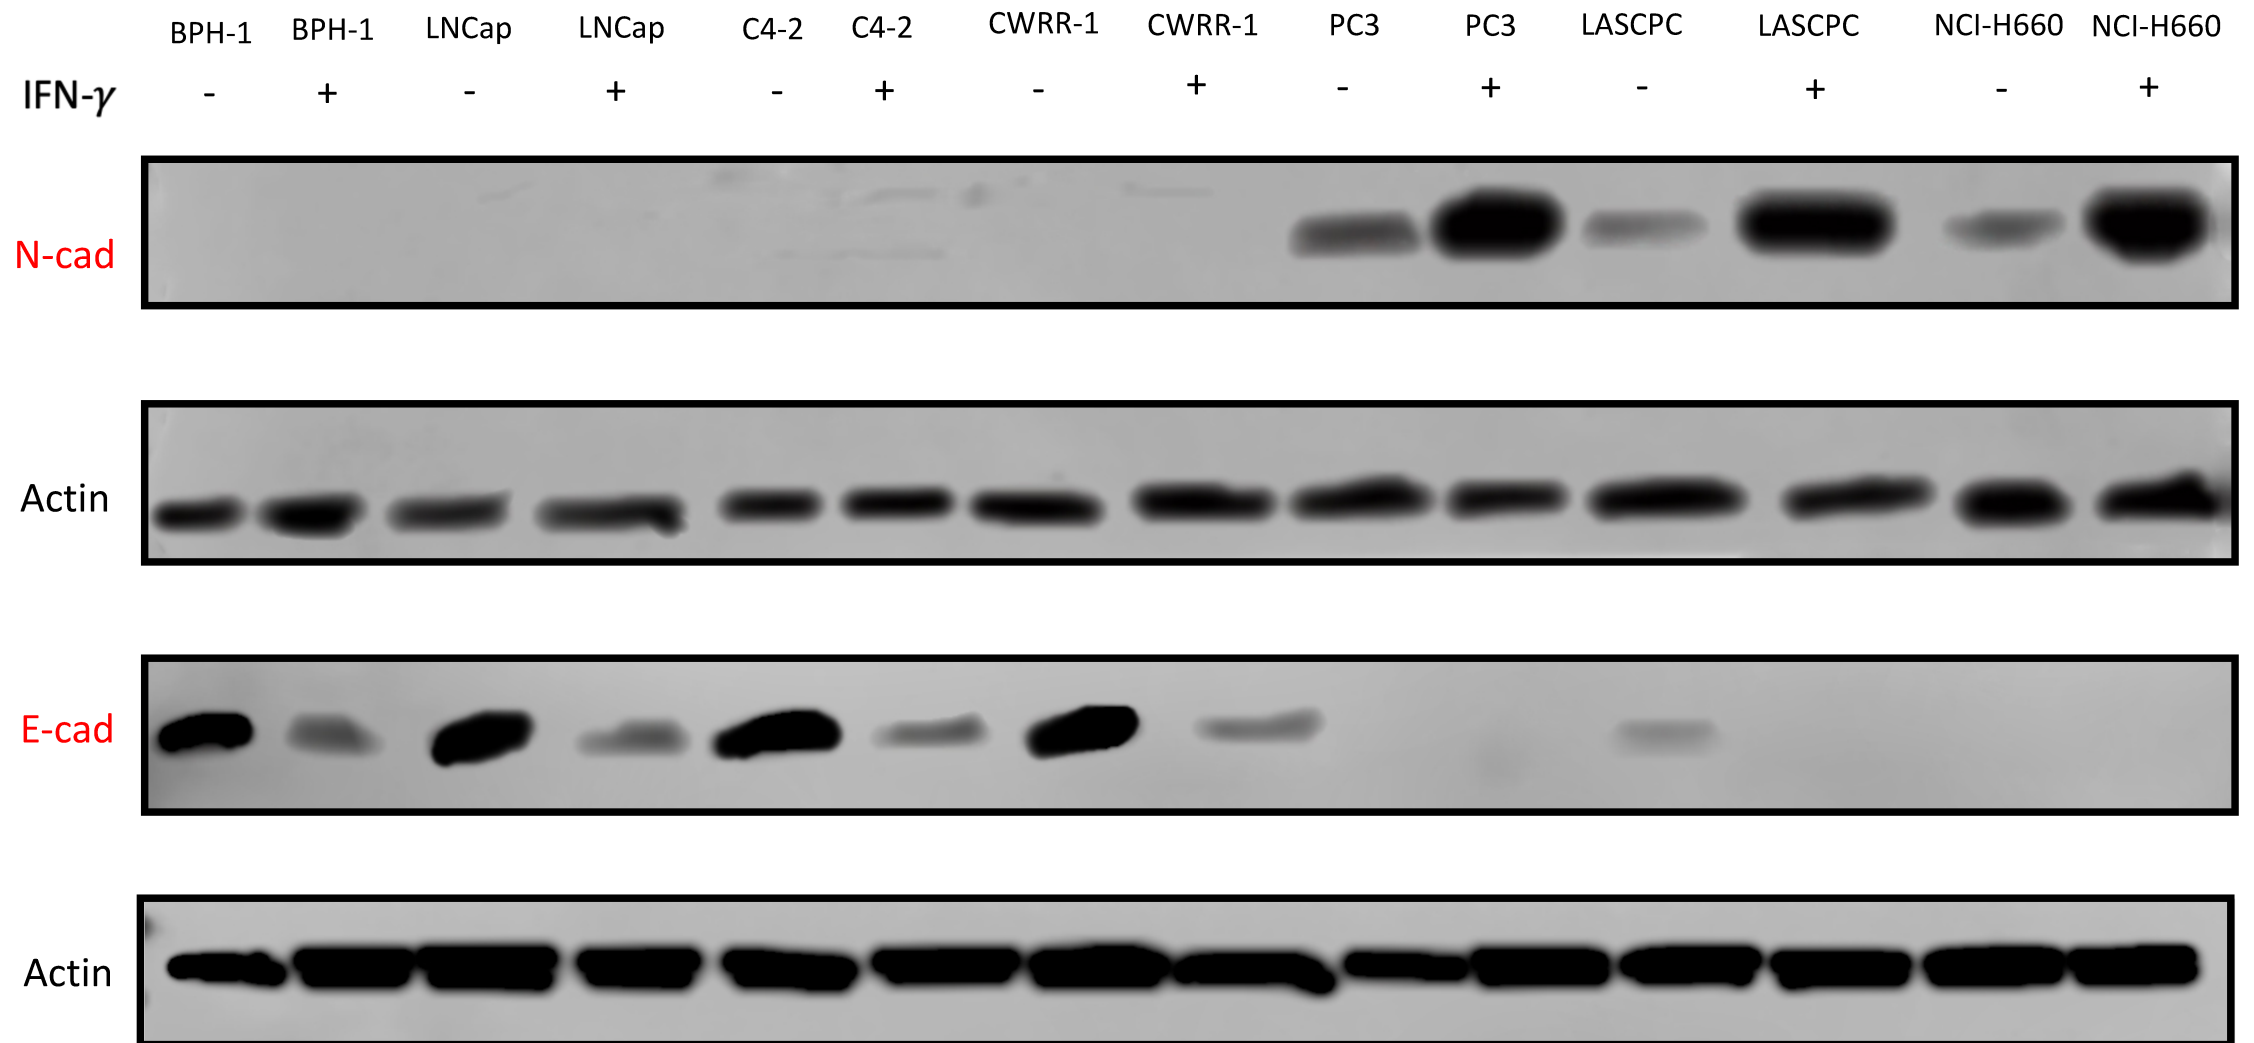

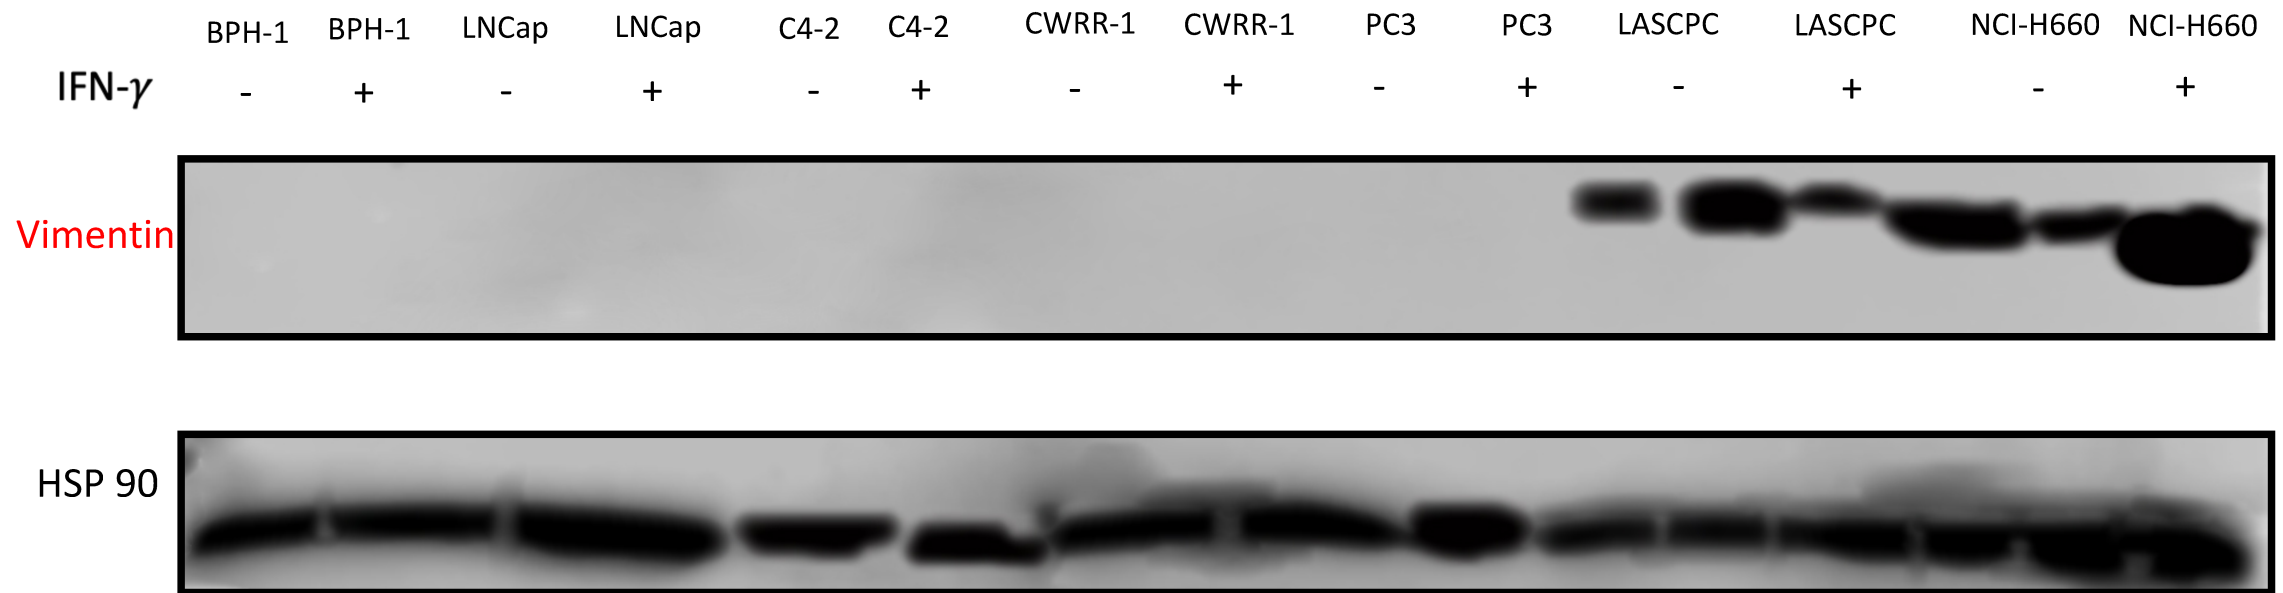

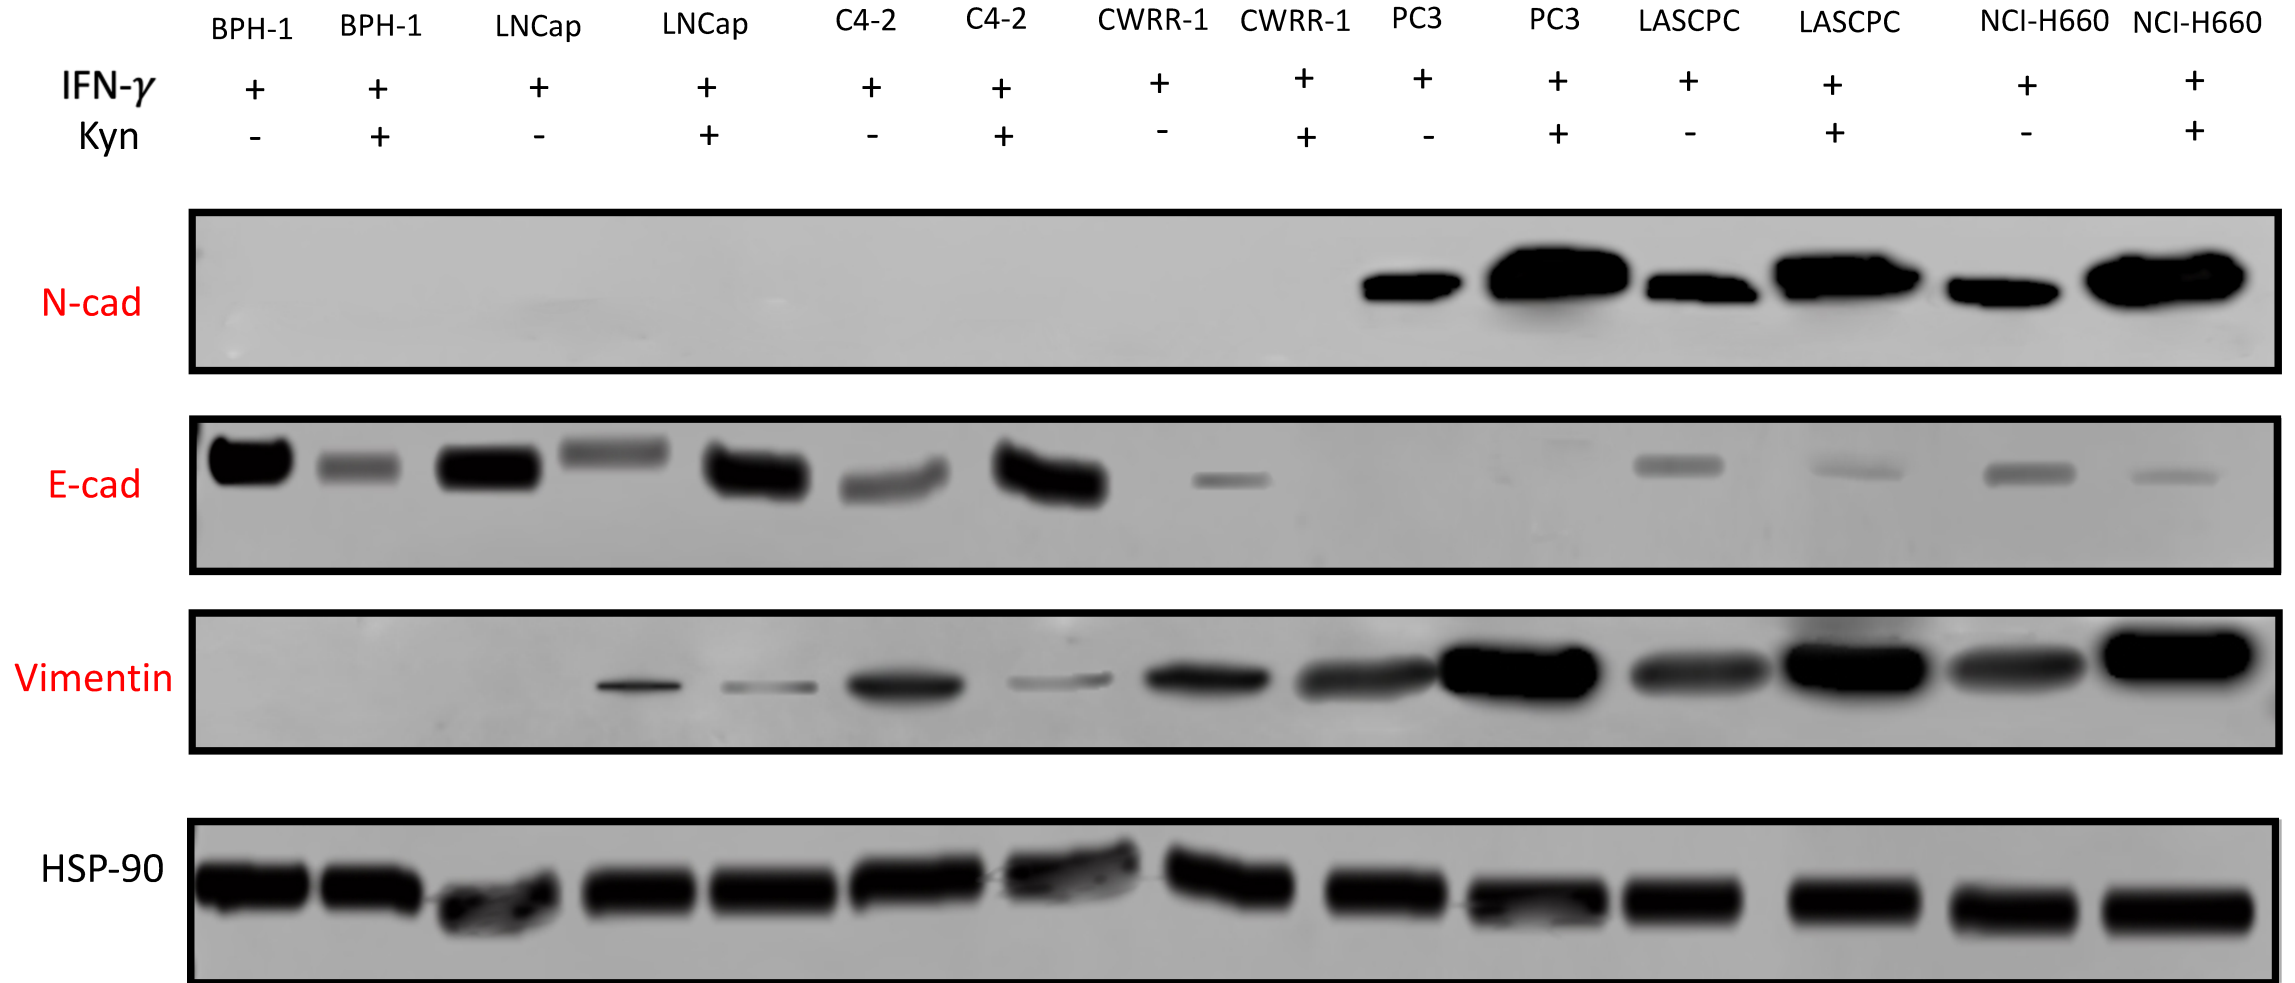

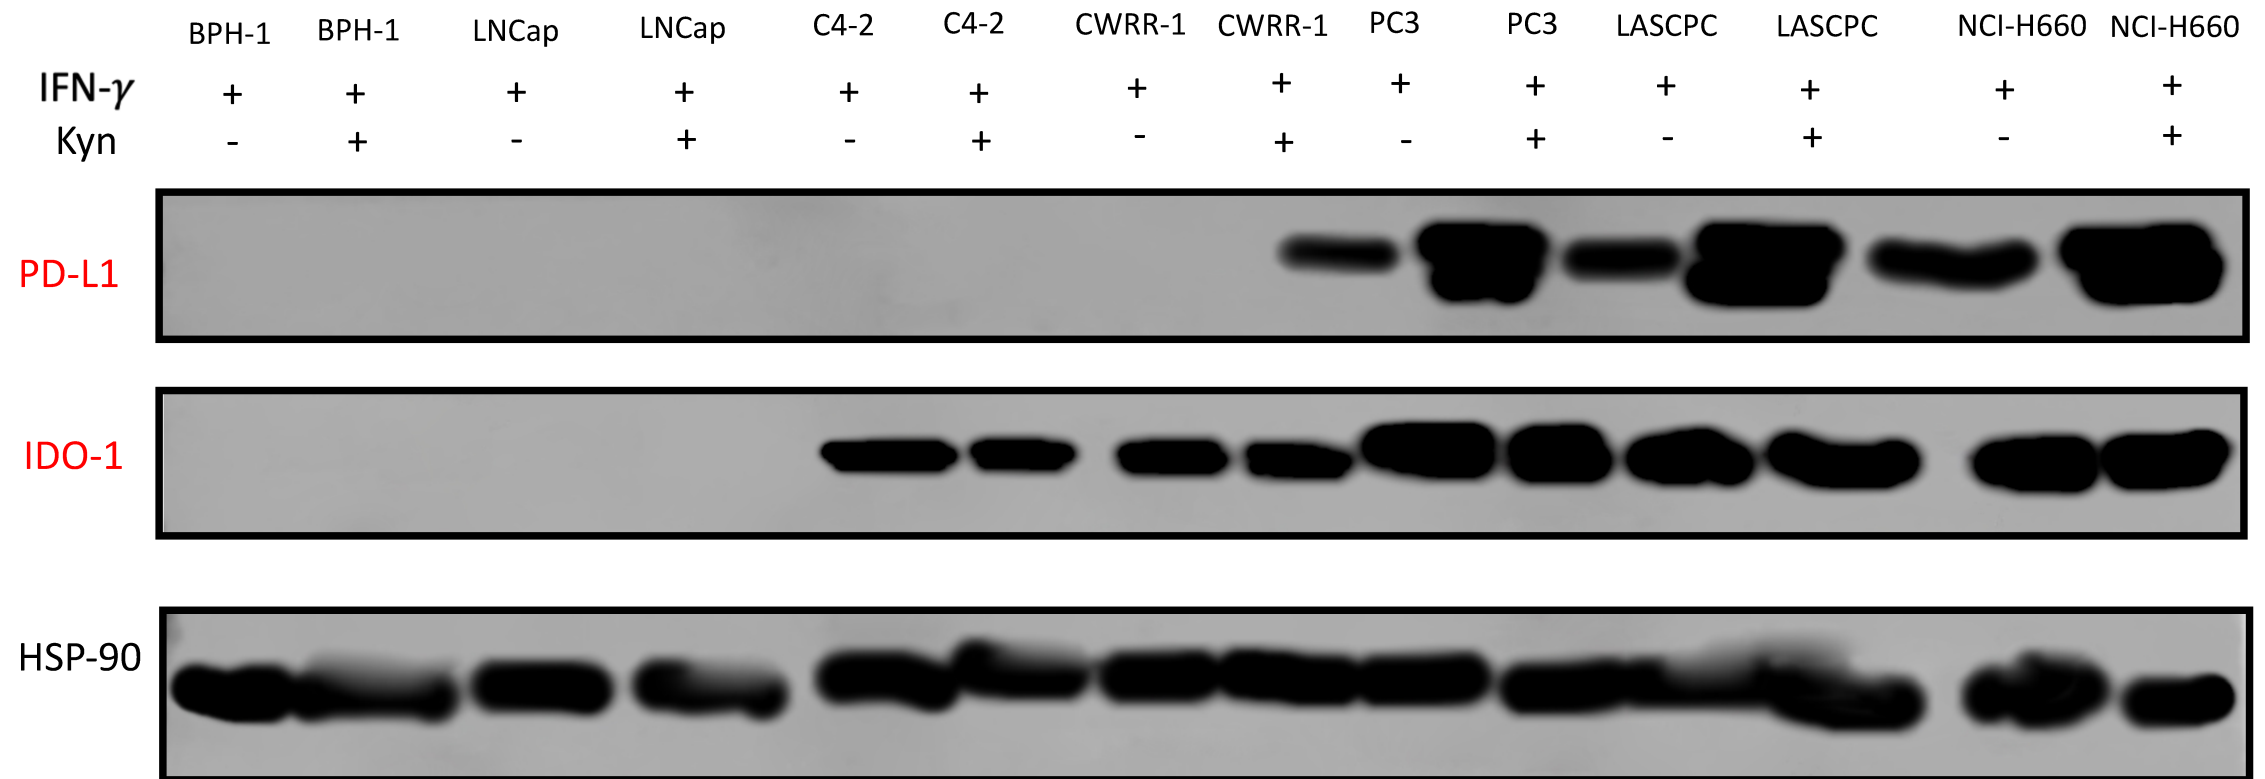

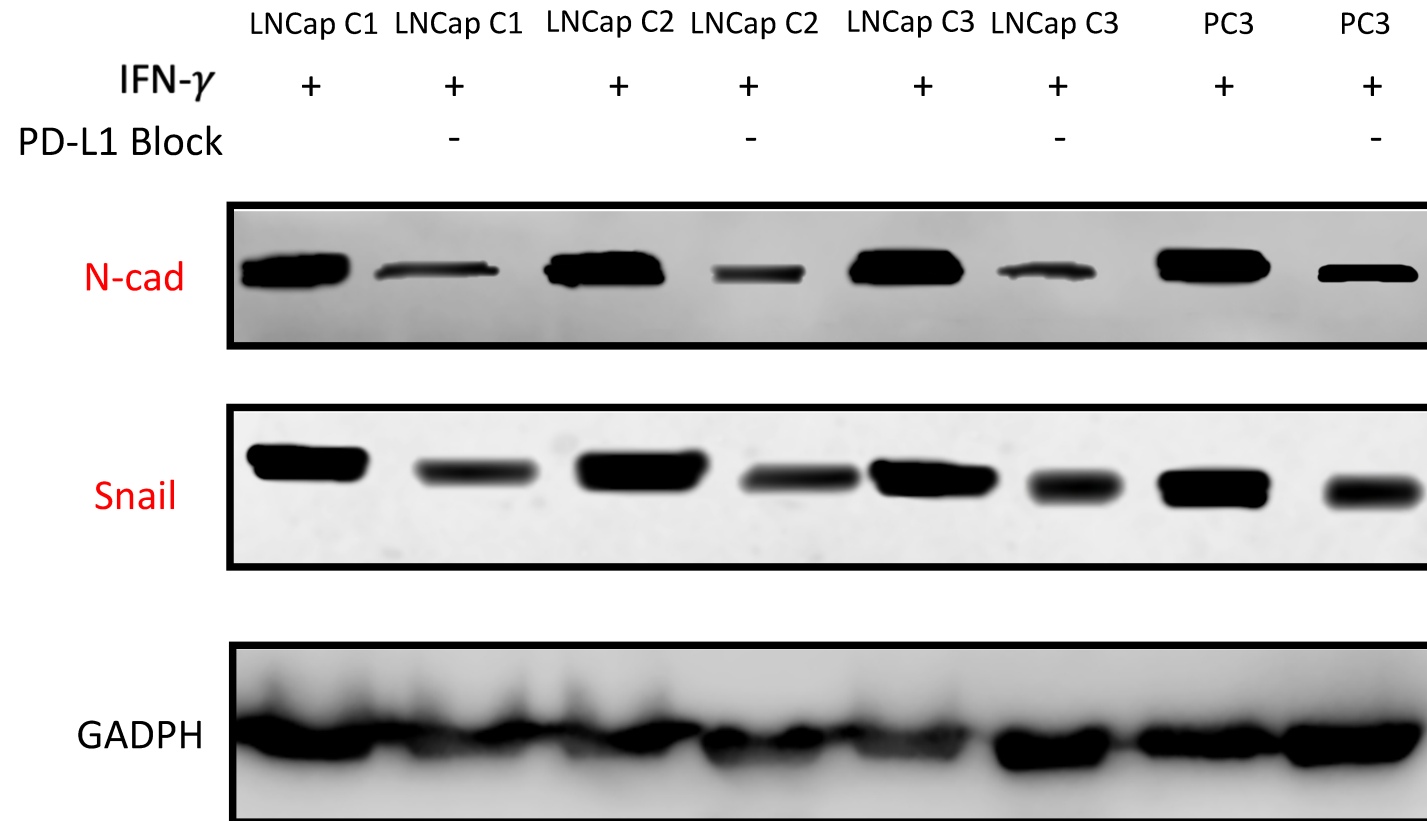



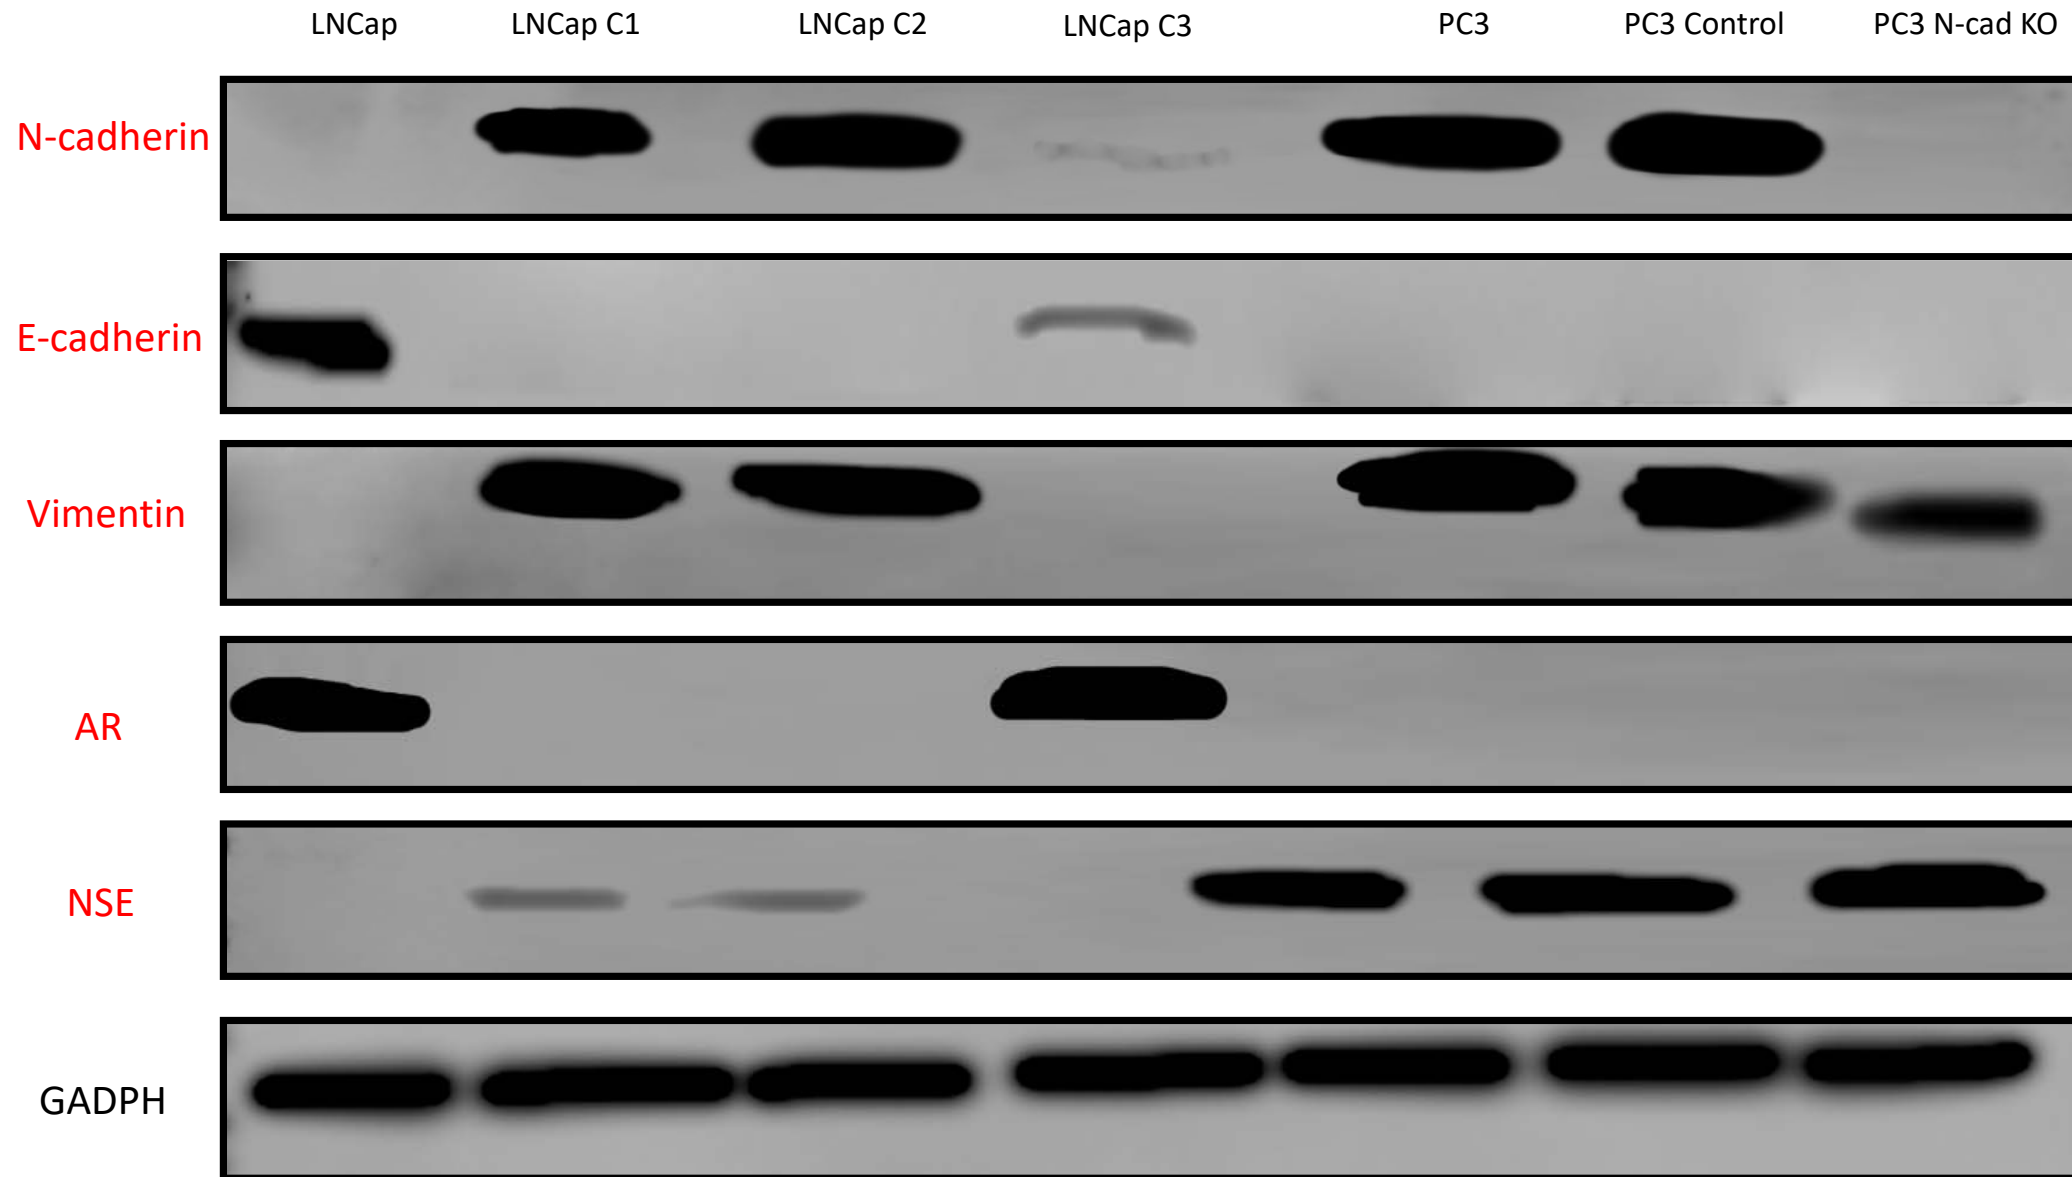

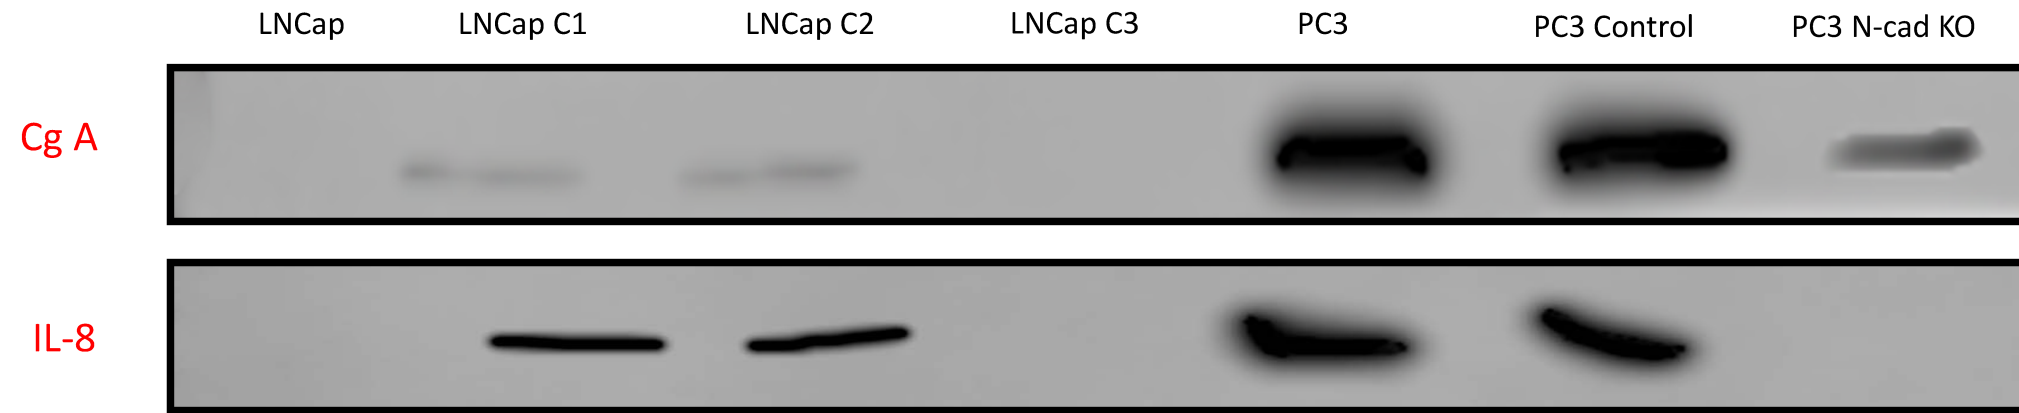

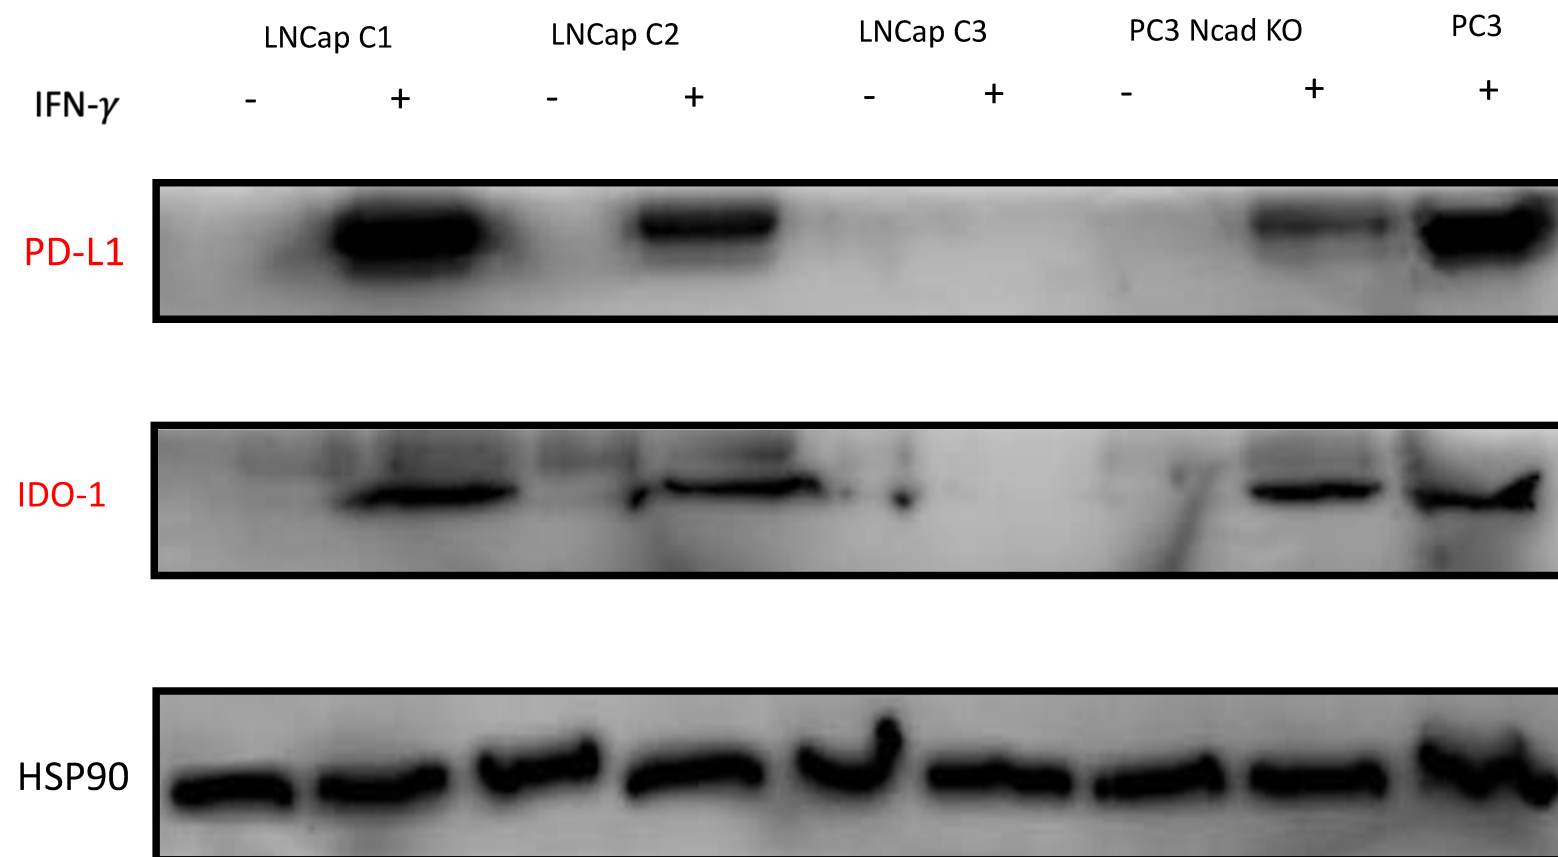

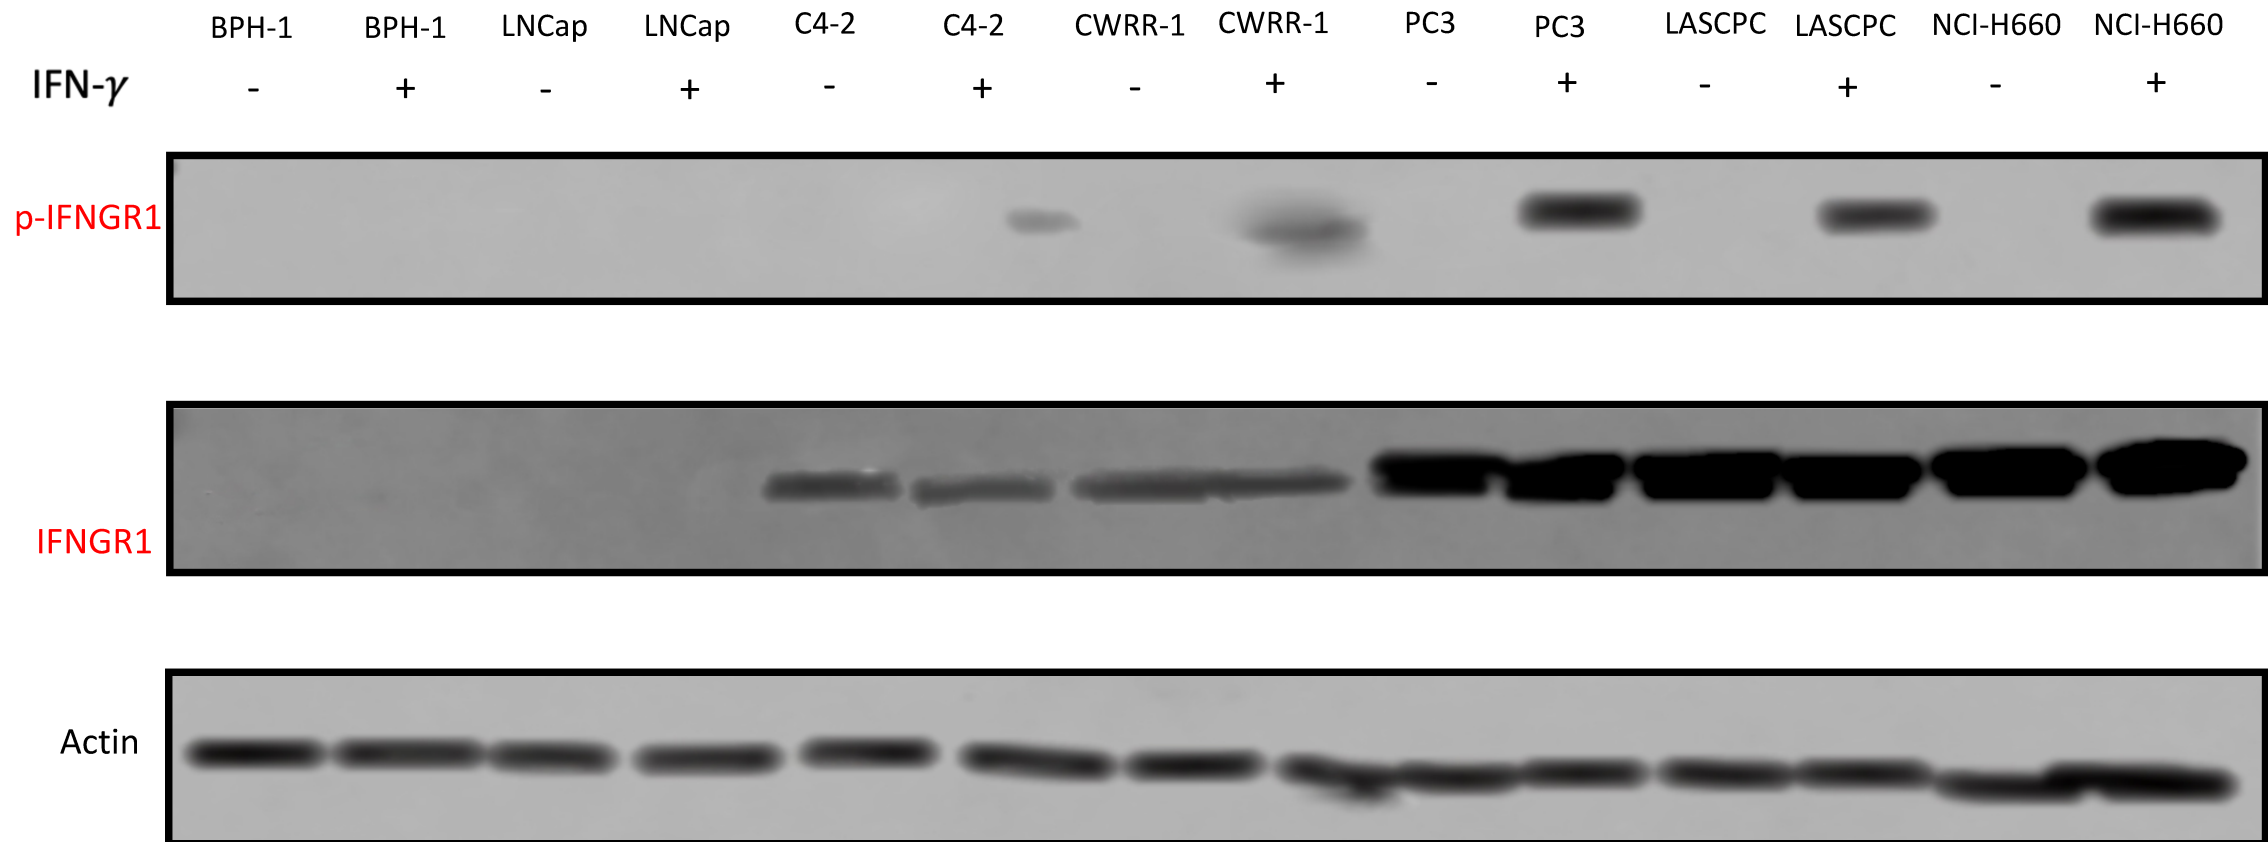

|               | C4-2 | C4-2 | CWRR-1 | CWRR-1 | PC3 | PC3 | LASCPC | LASCPC | NCI-H660 | NCI-H660 |
|---------------|------|------|--------|--------|-----|-----|--------|--------|----------|----------|
| IFN- $\gamma$ | +    | +    | +      | +      | +   | +   | +      | +      | +        | +        |
| JAK/STAT      | +    | -    | +      | -      | +   | -   | +      | -      | +        | -        |

IDO-1

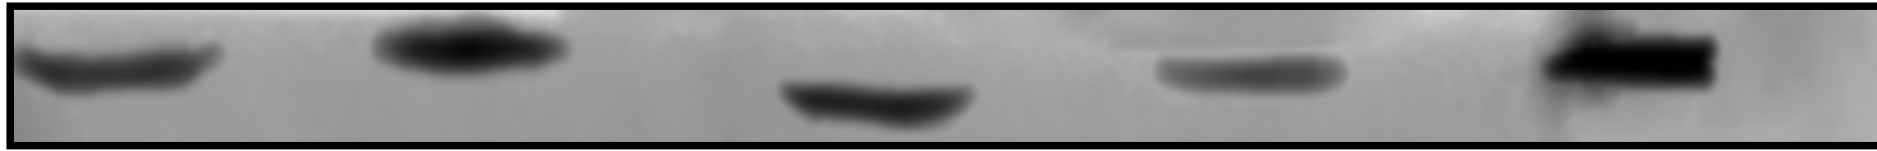

PD-L1

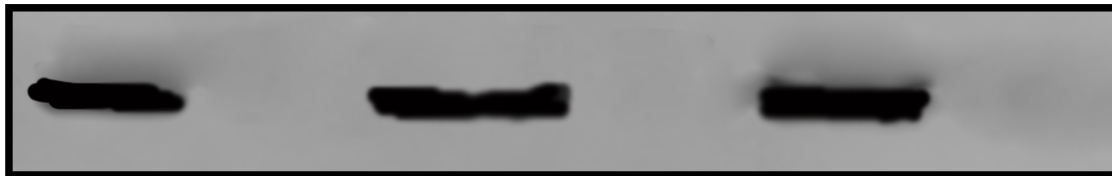

HSP 90

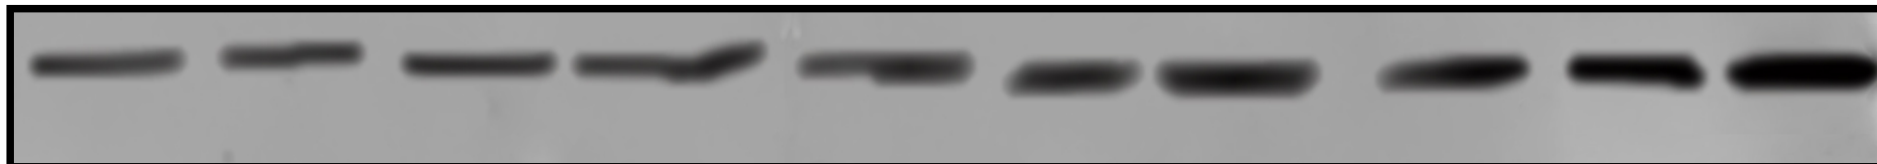

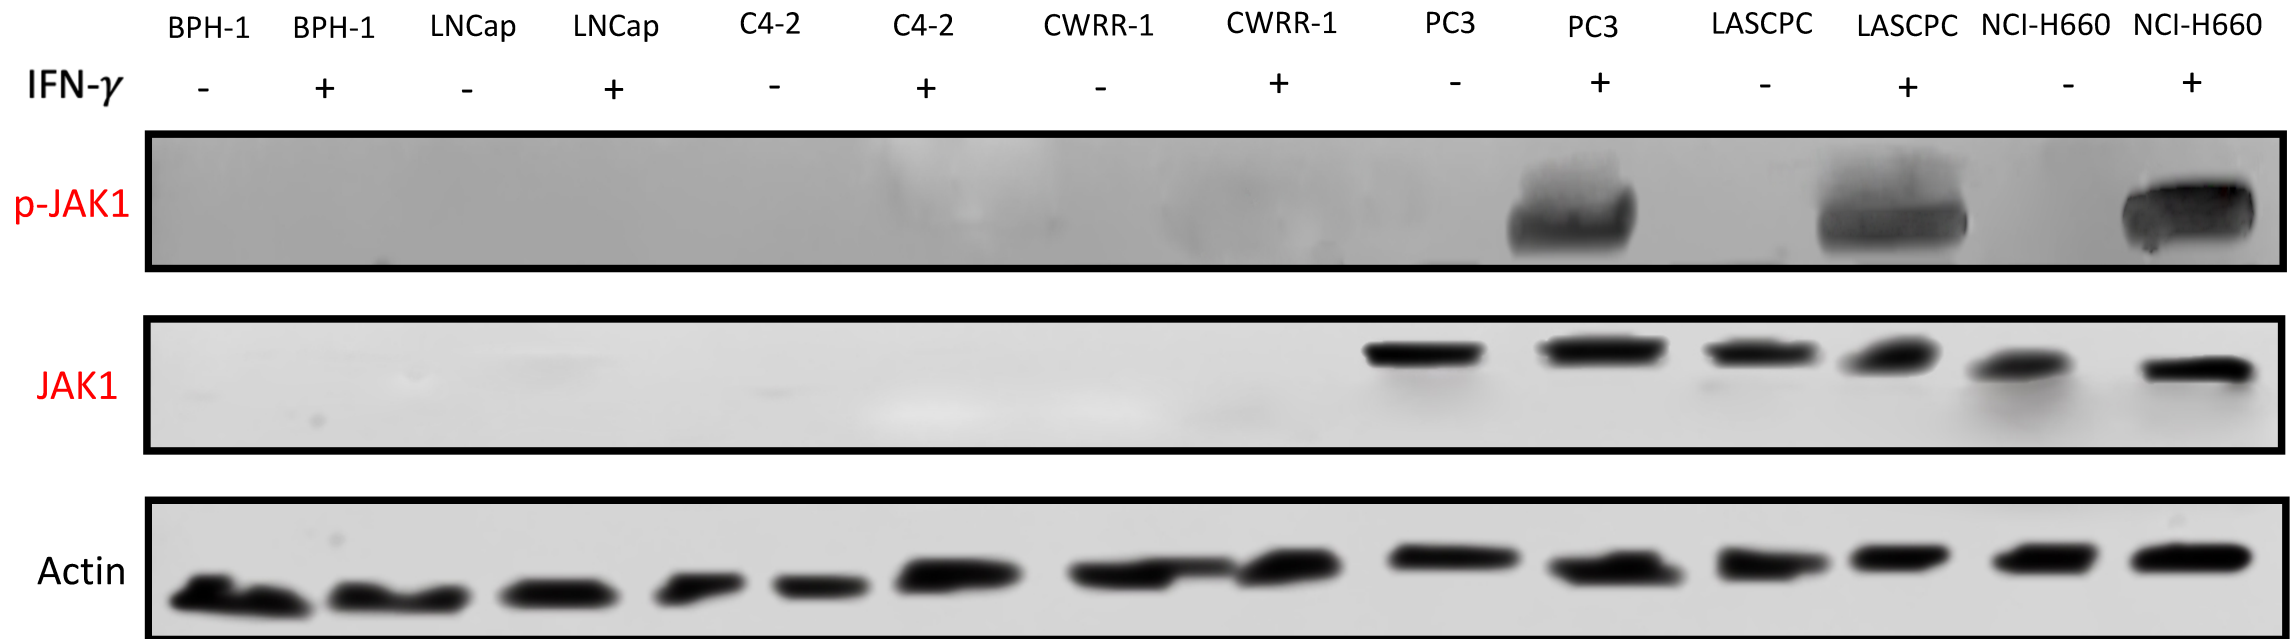

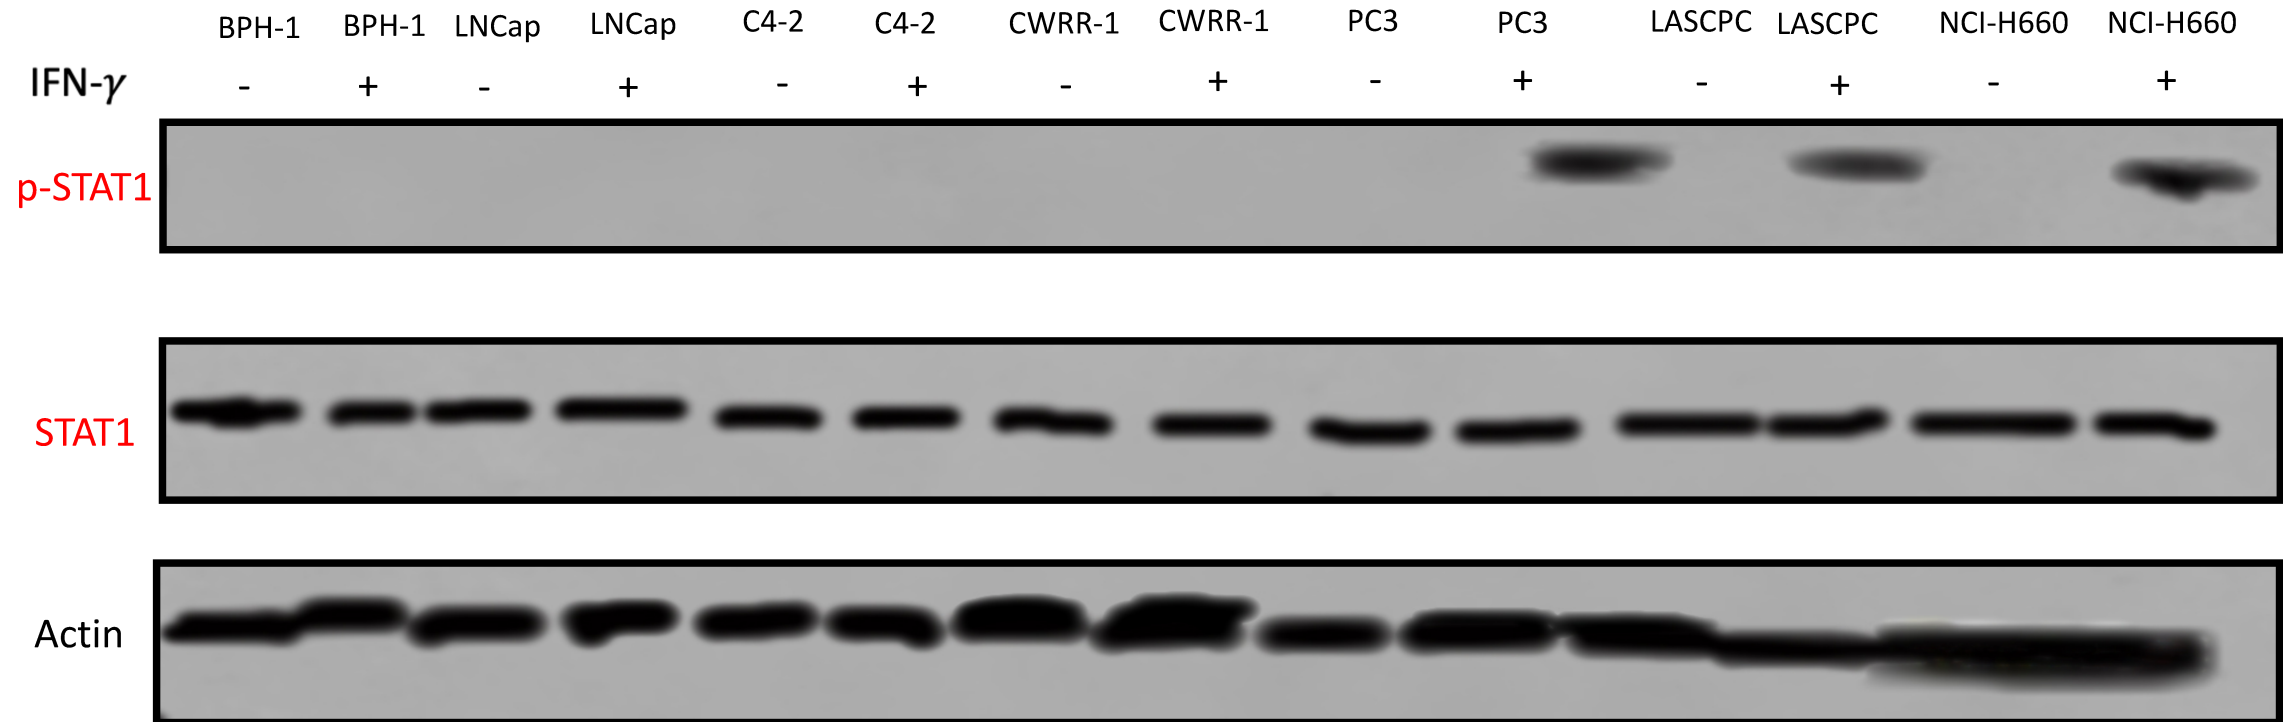

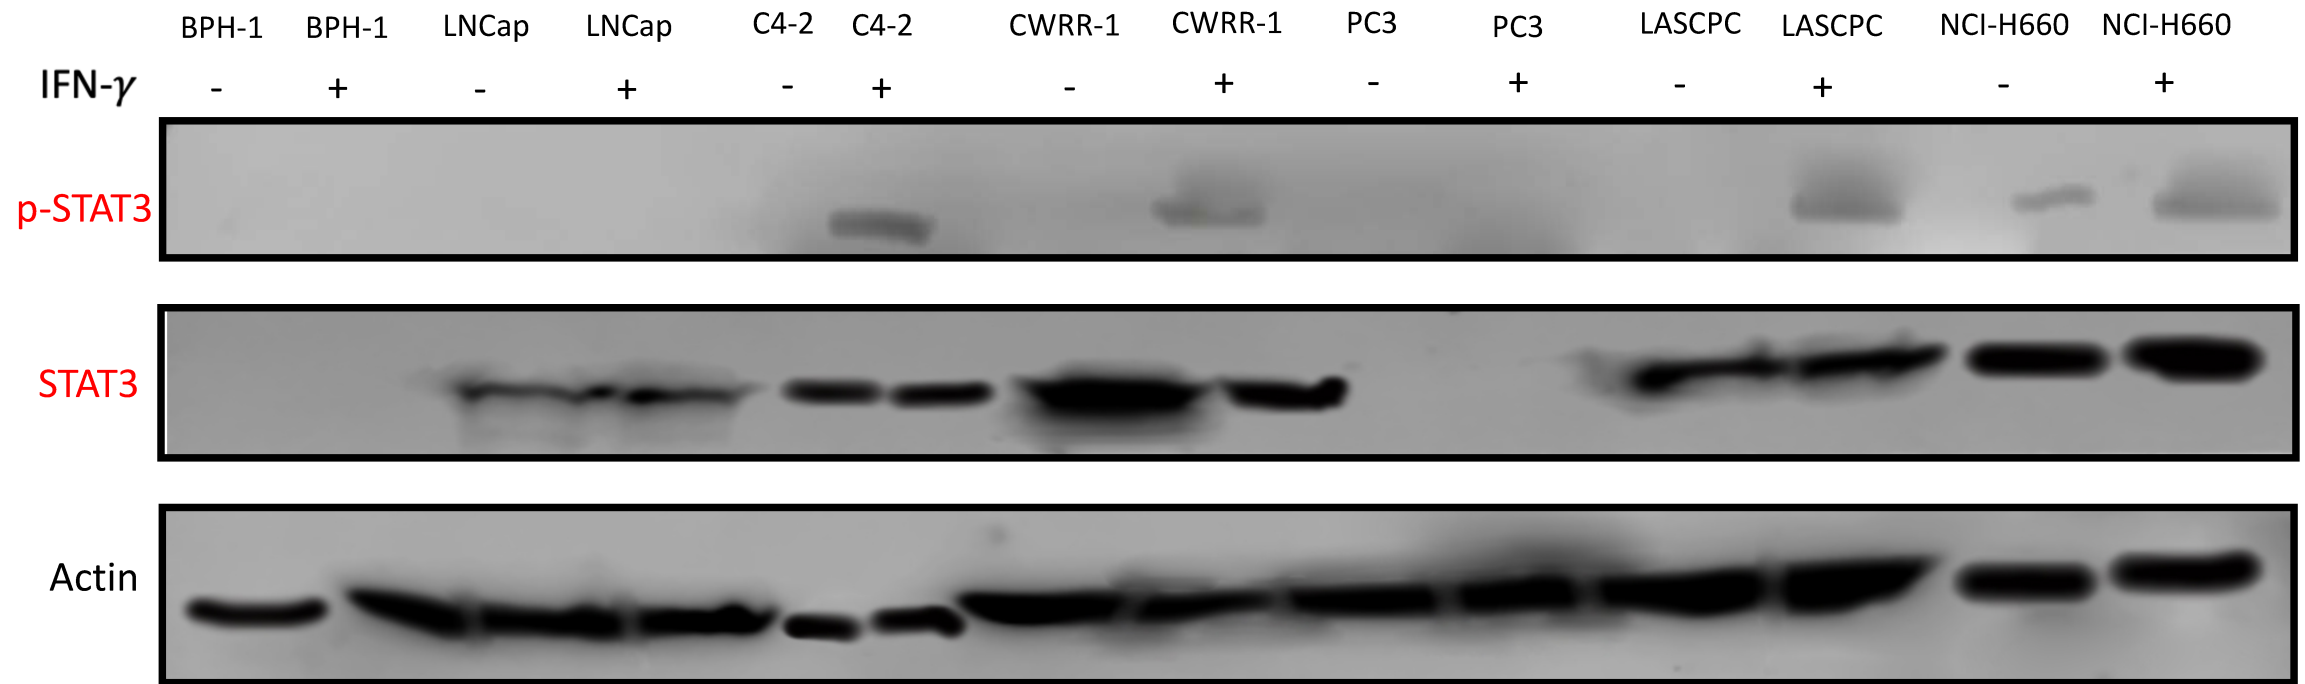



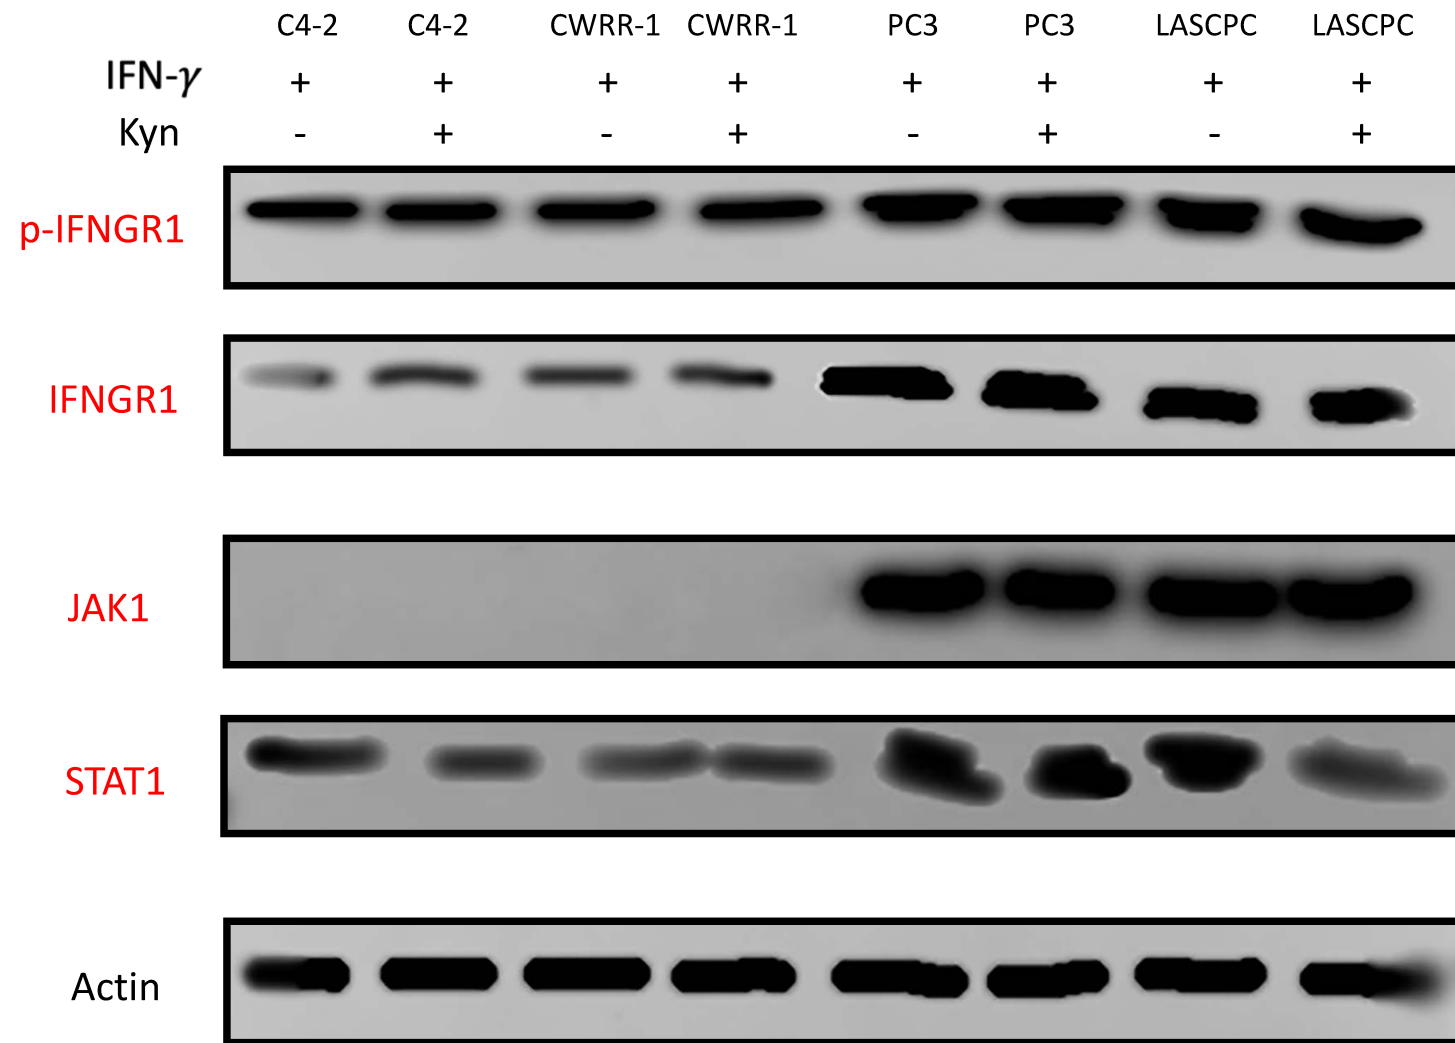

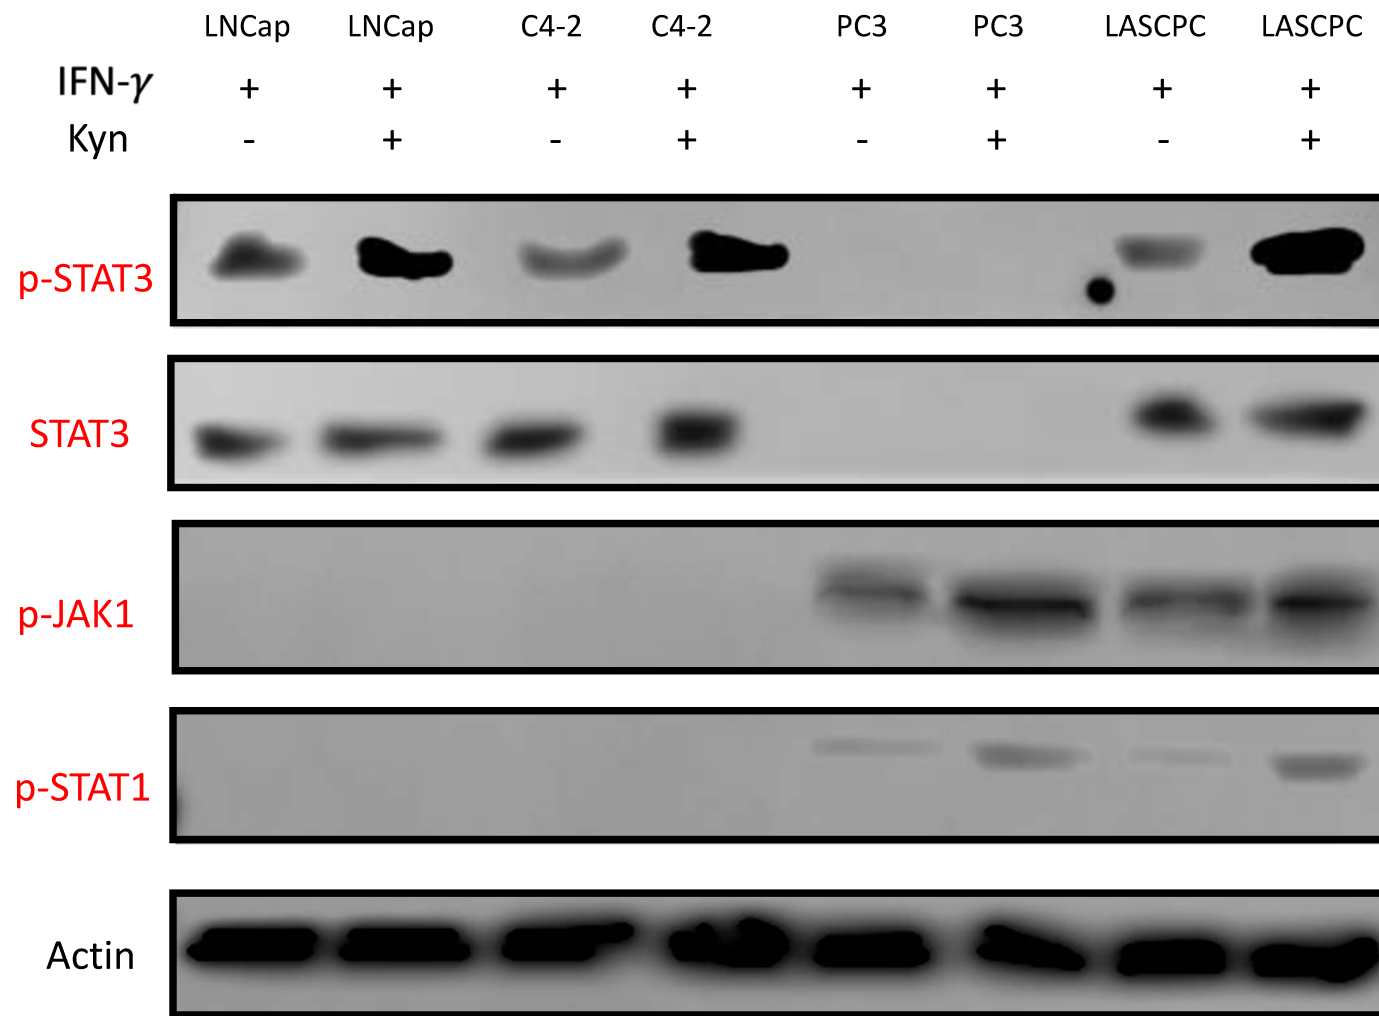

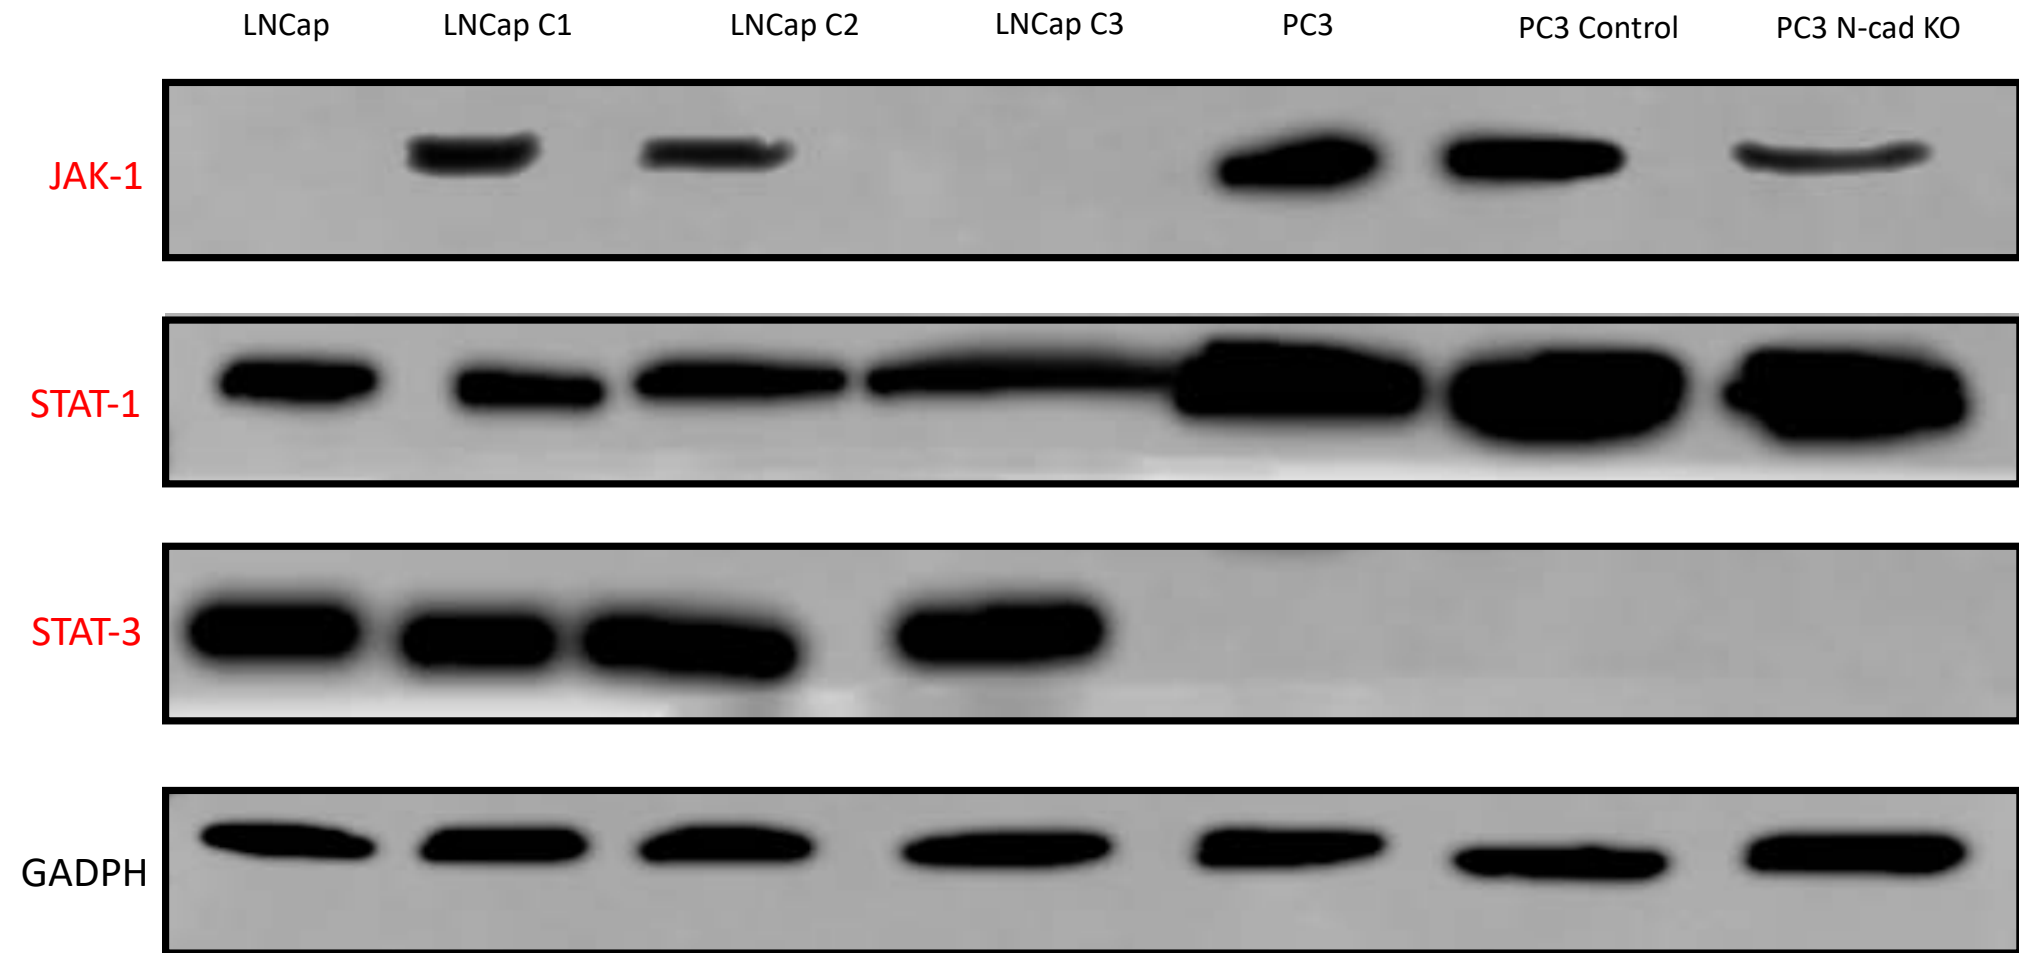

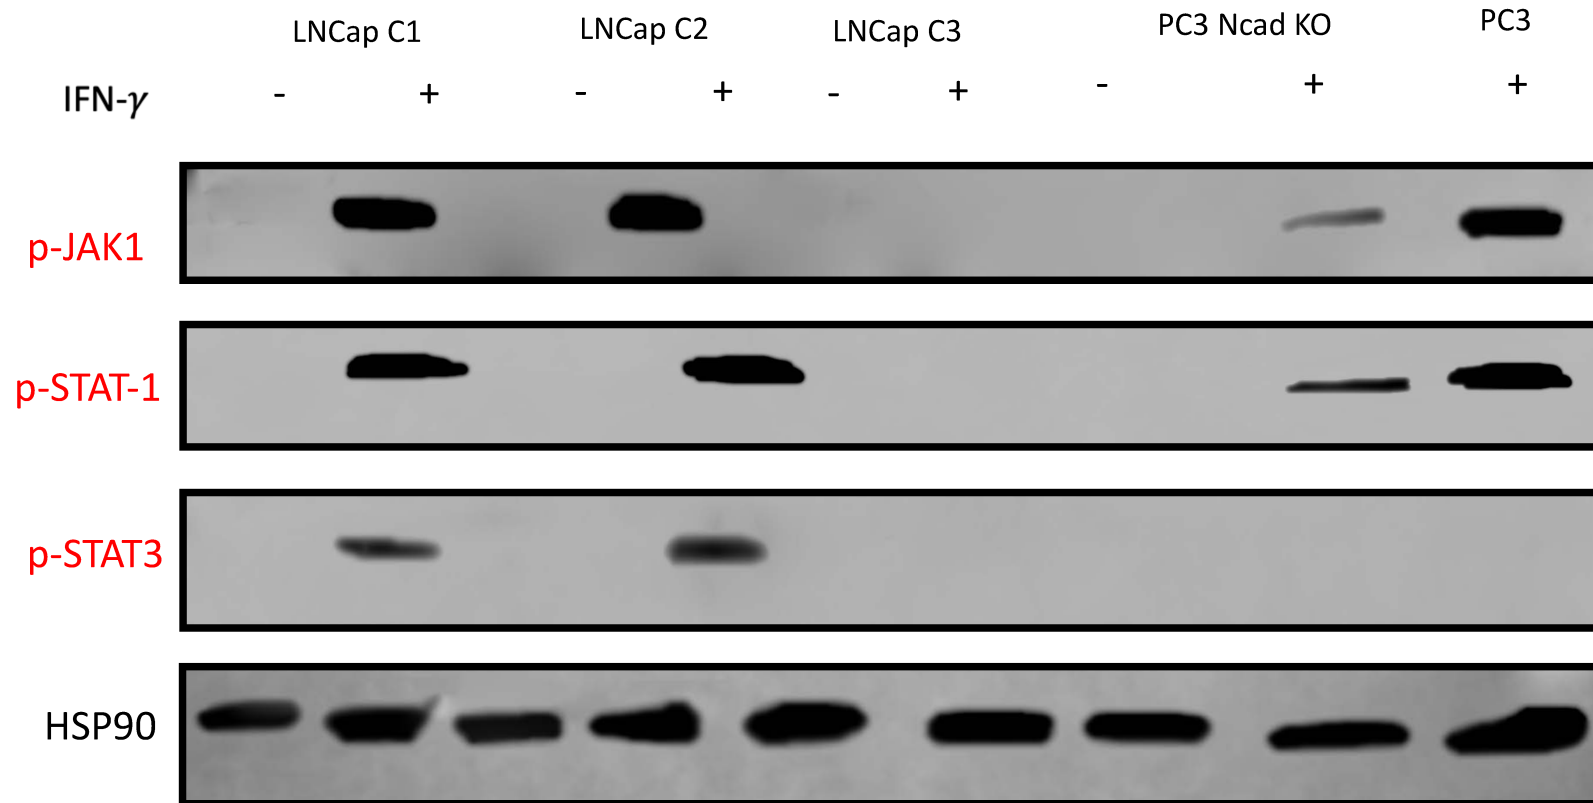

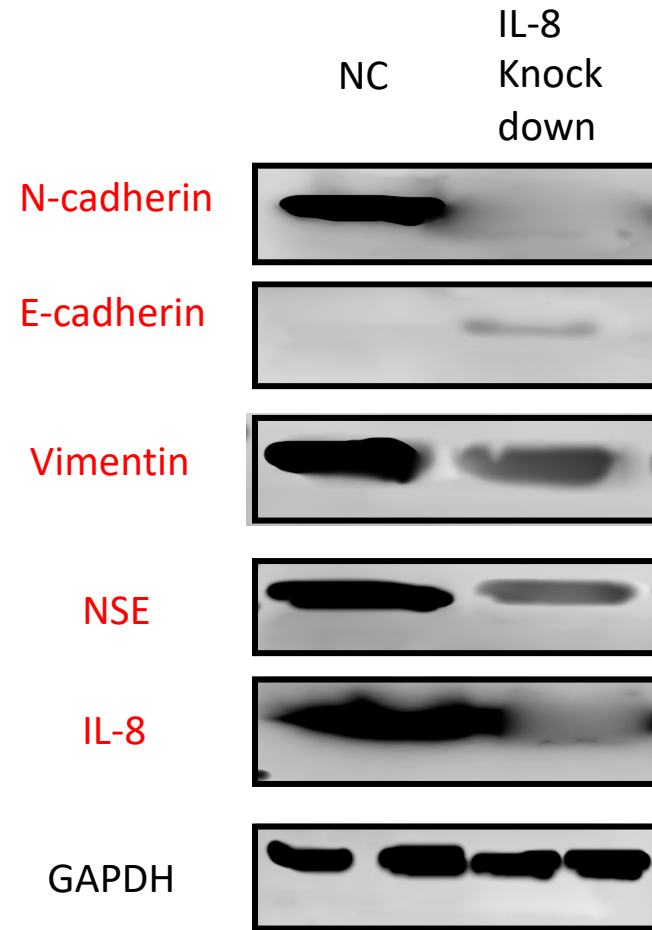

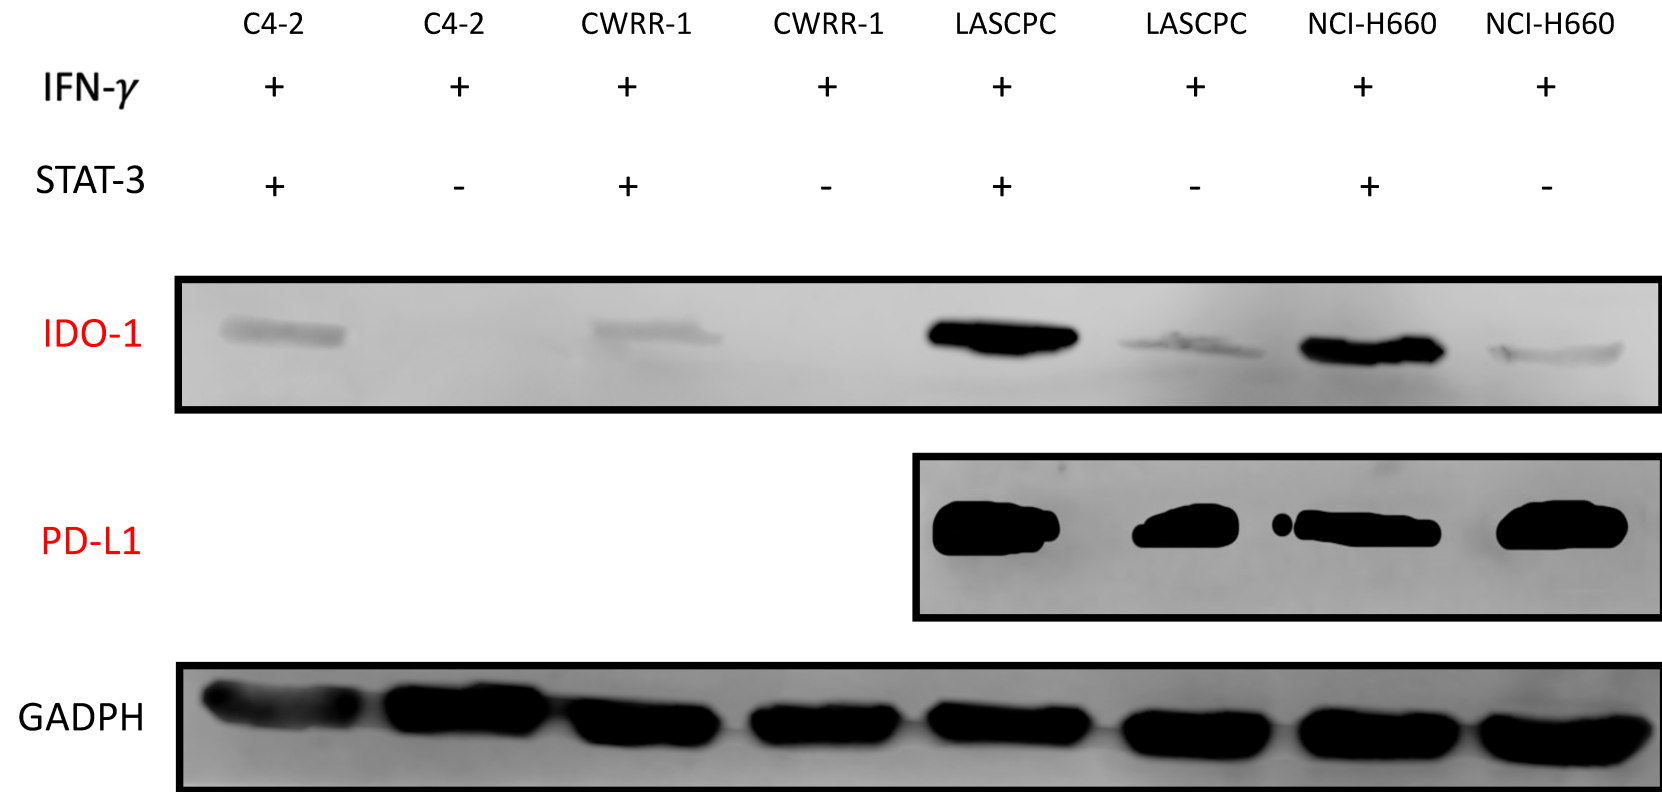

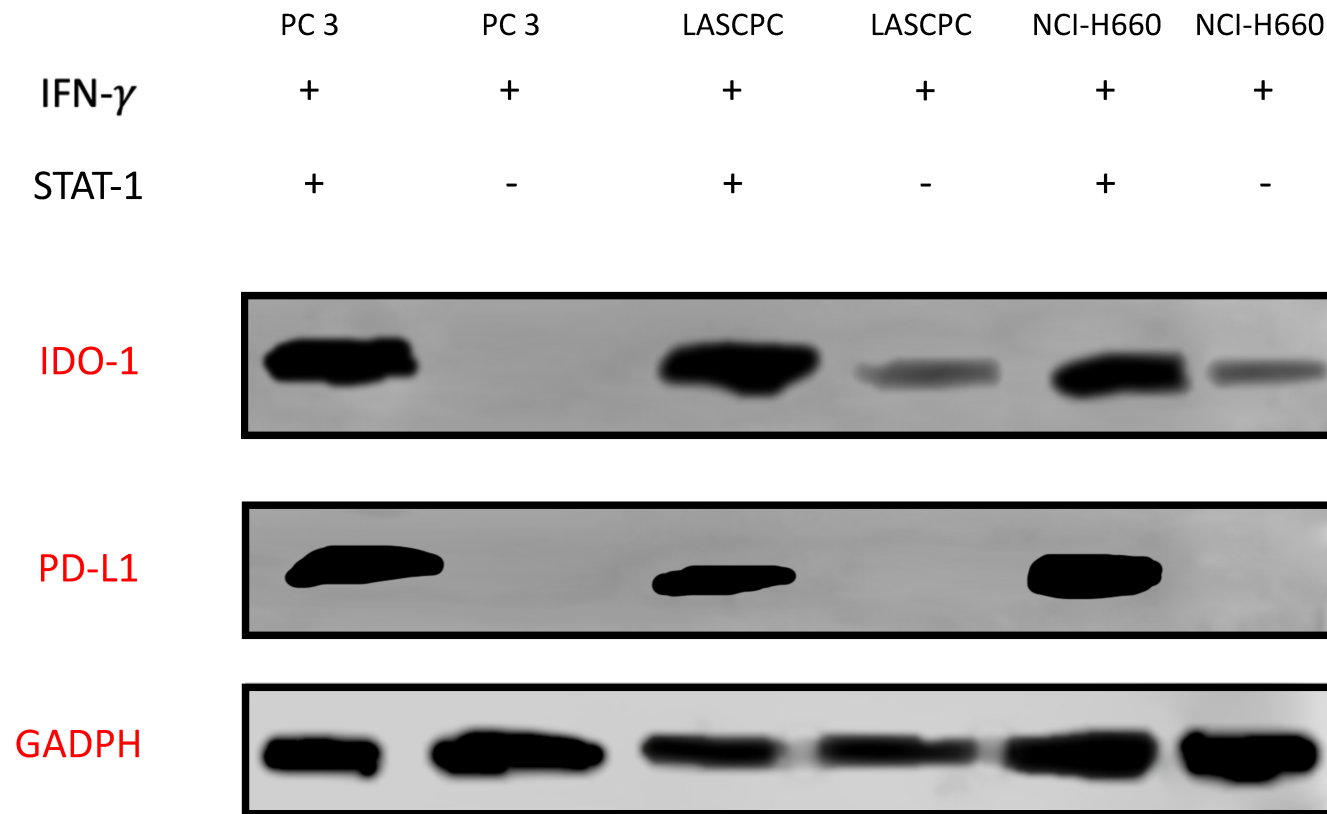

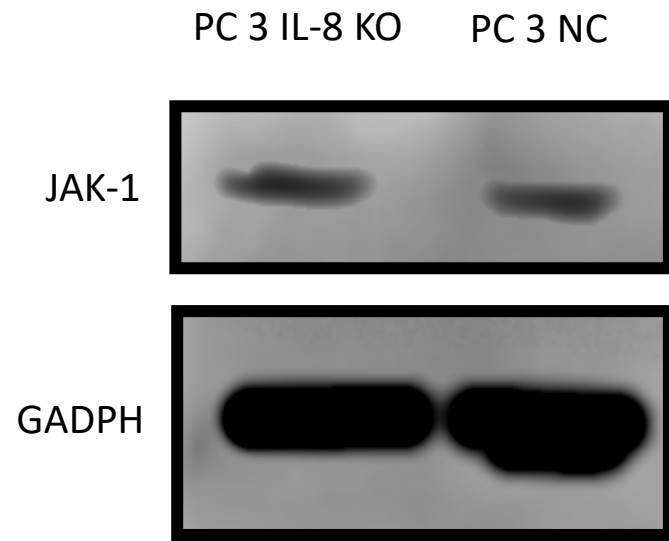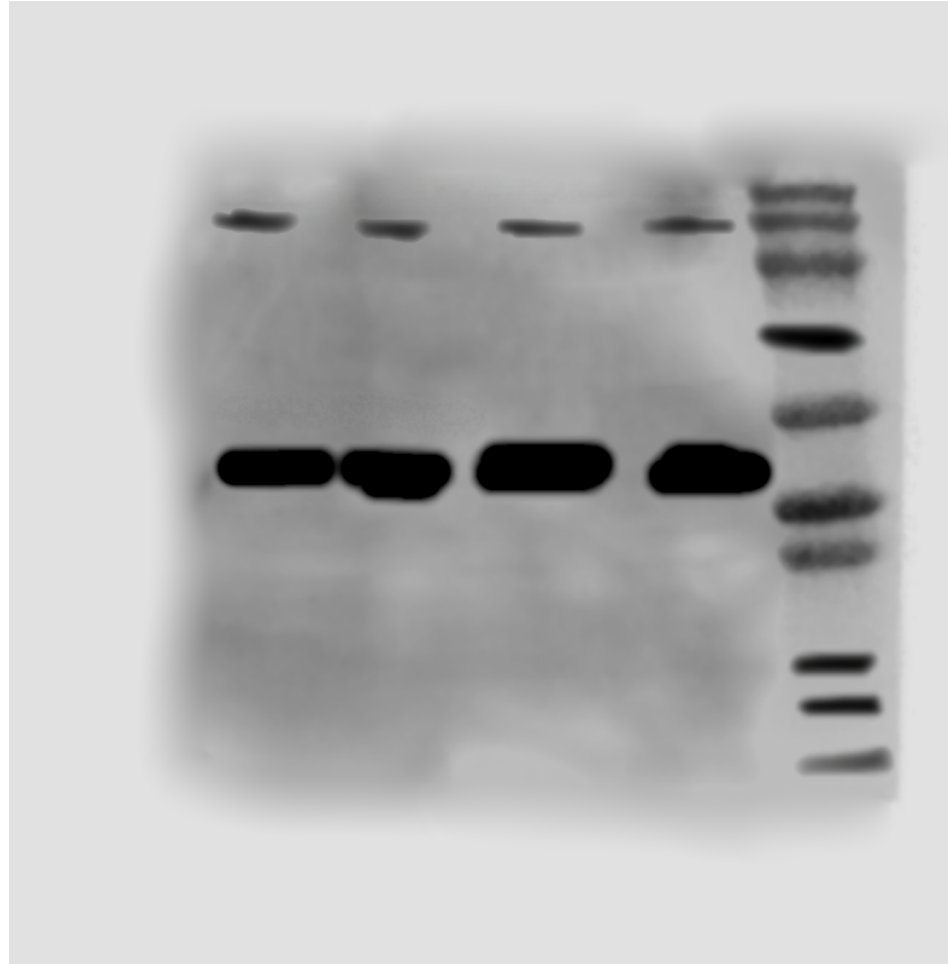



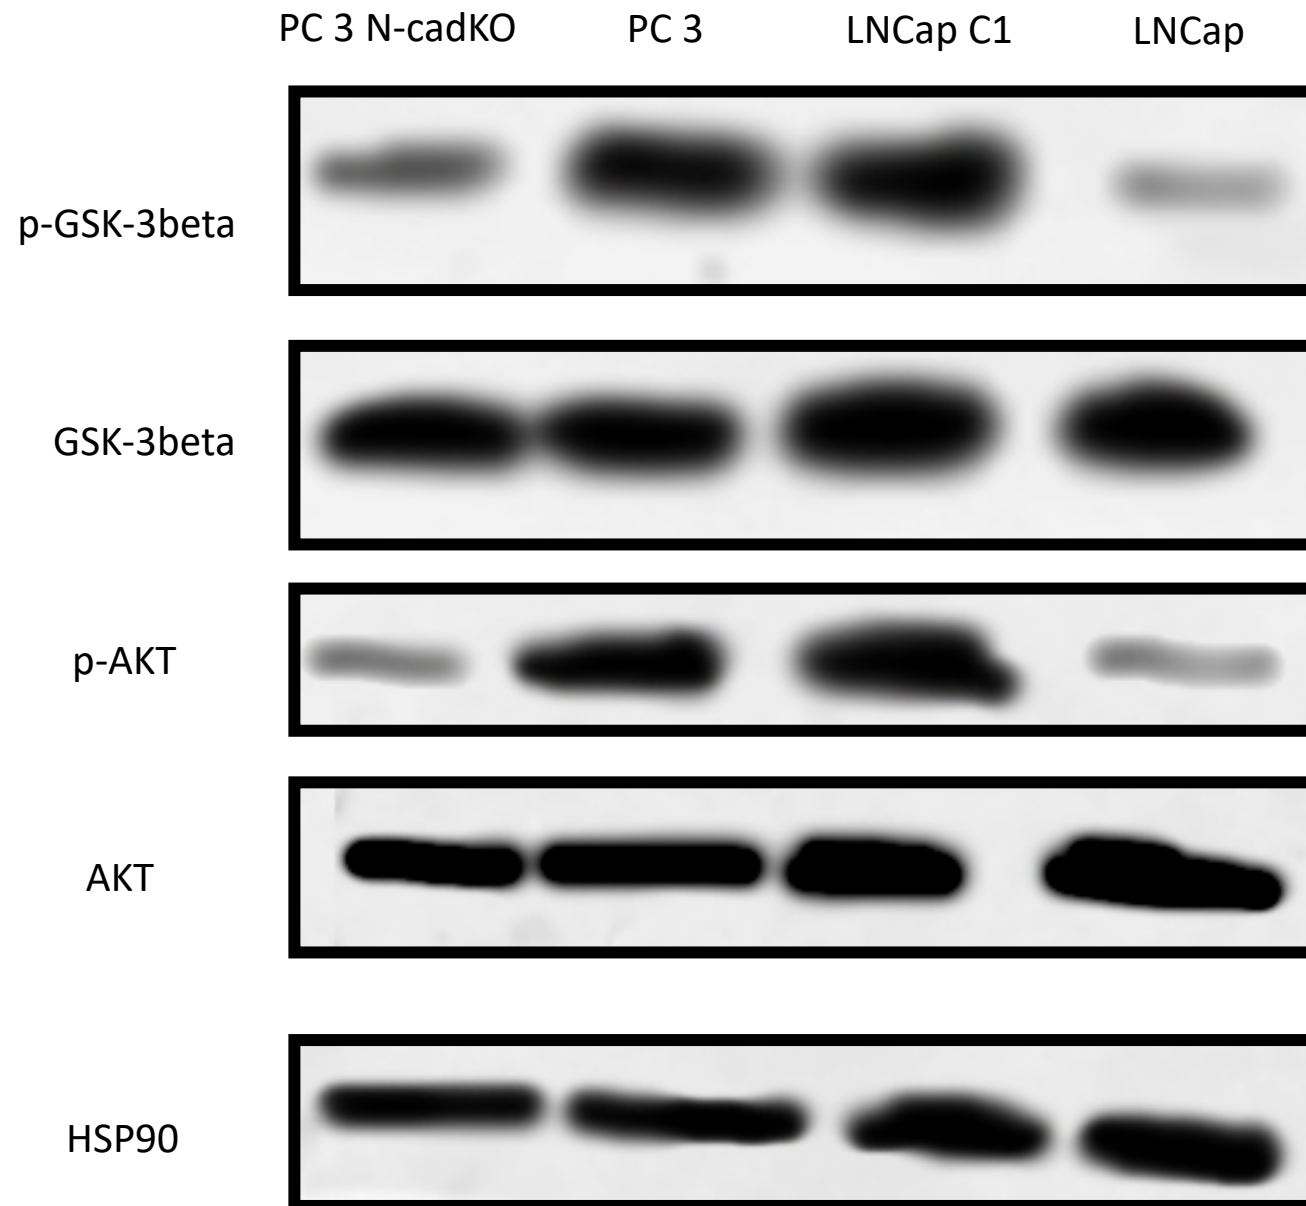

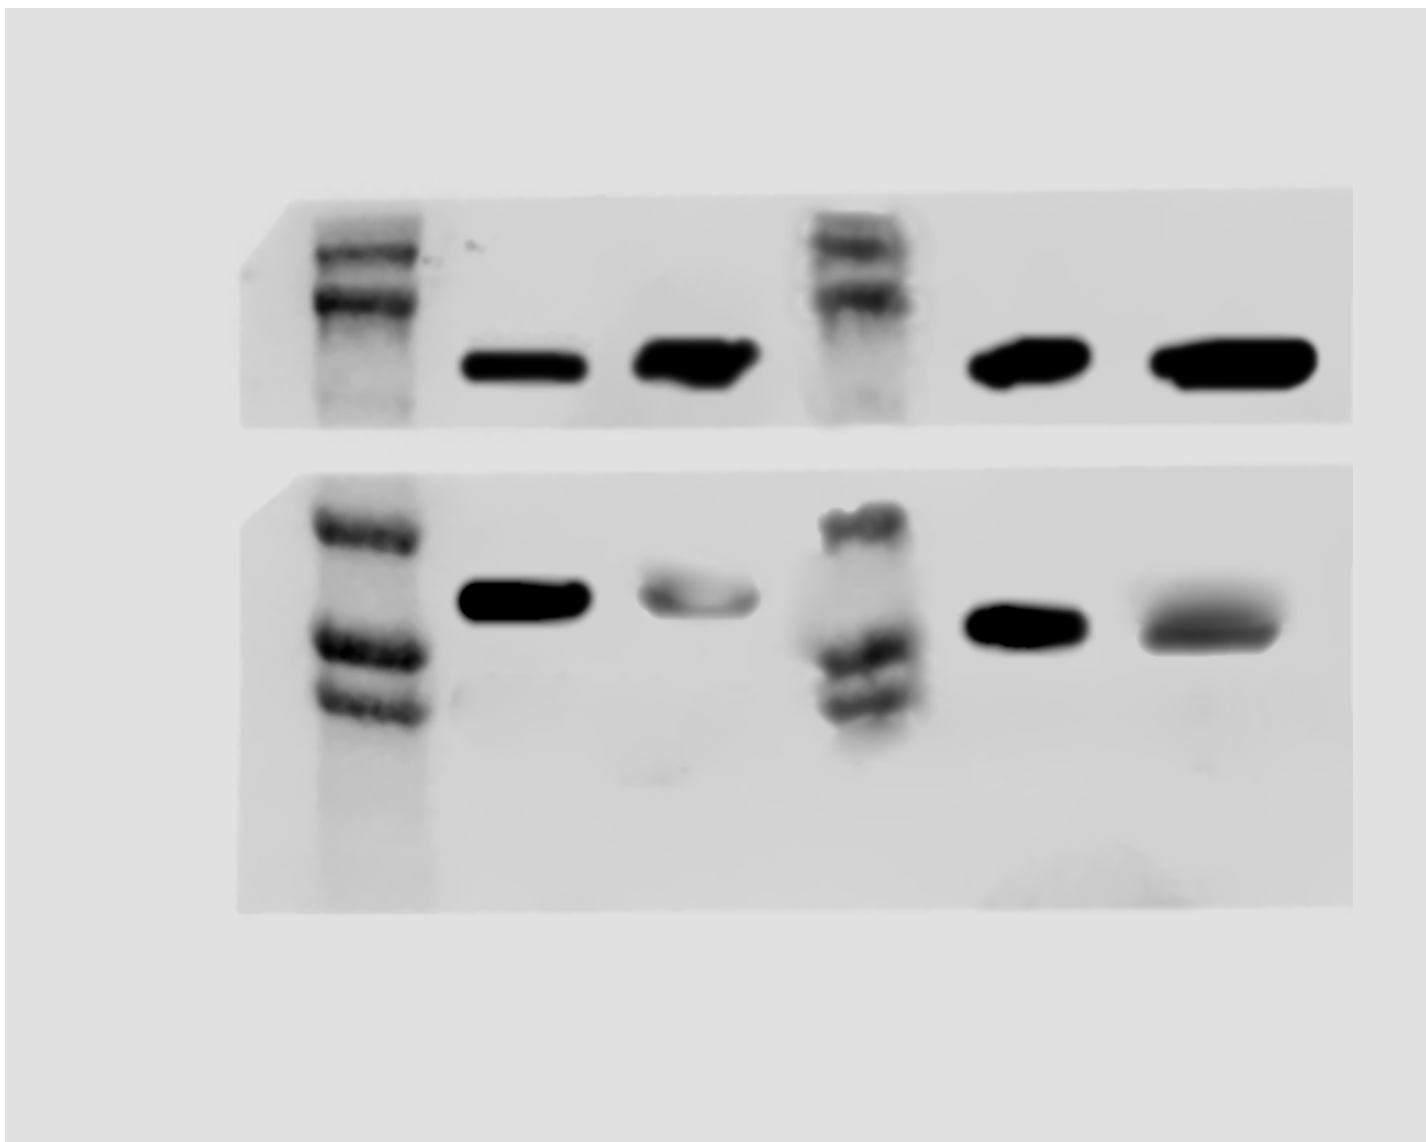

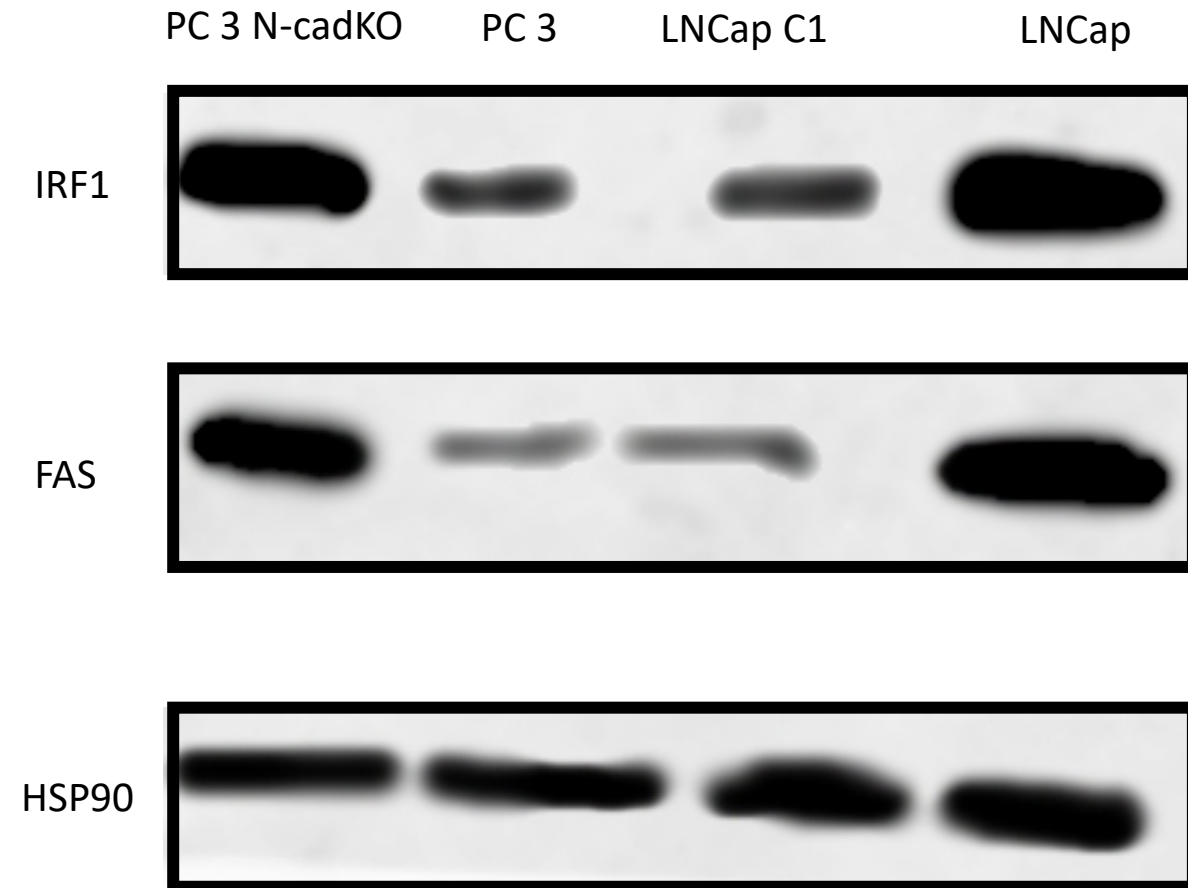

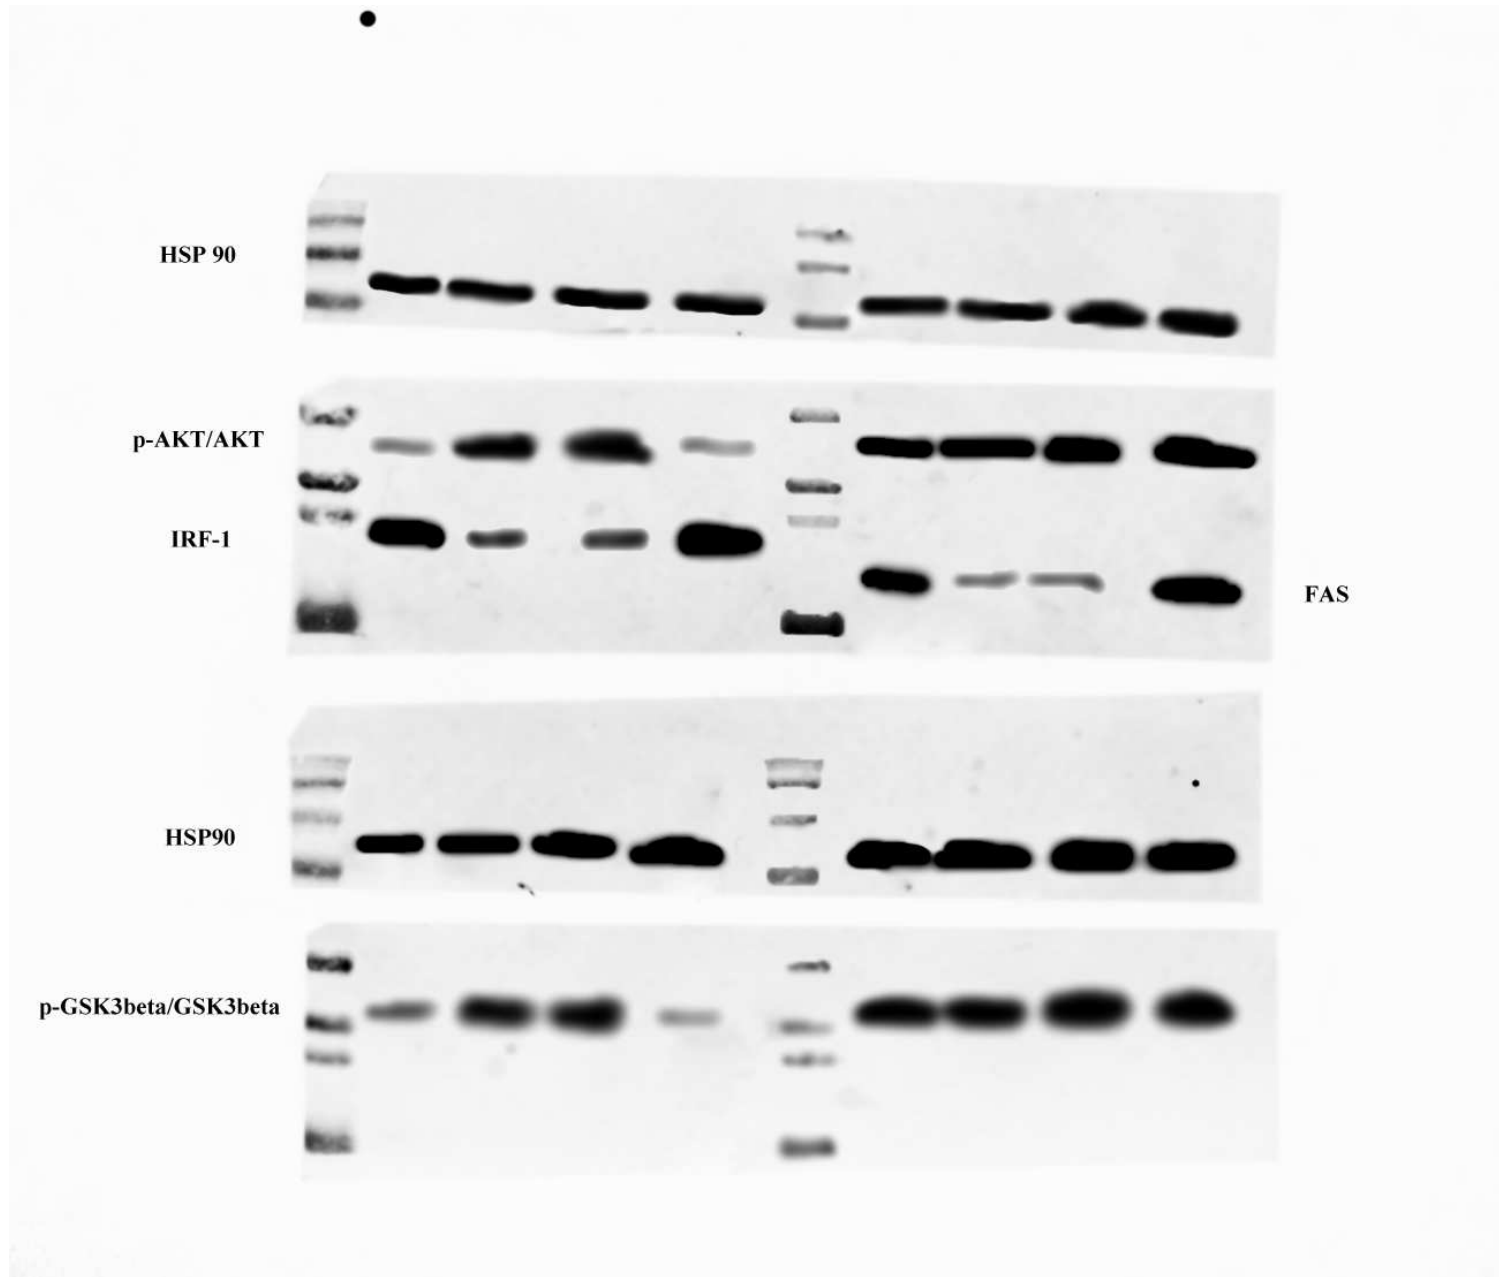

Supplement: jitc-2020-002138supp001.pdf [file jitc-2020-002138supp001.pdf]
