# Supplementary material for: N-cadherin inhibitor creates a microenvironment that protect TILs from immune checkpoints and Treg cells
Source: PubMed Central journal article supplement (PMC7949480; doi:10.1136/jitc-2020-002138), 2021-03-10
Supplement: jitc-2020-002138supp002.pdf [file jitc-2020-002138supp002.pdf]

**Primers****IFNGR1:**

forward, 5'-TCCTCAGTGCCTACACCAACTAATG-3';

reverse, 5'-CTGGATCTCACTTCCGTTTATTCTC-3'.

**JAK1:**

forward, 5'-AATGTTCTCTATGAGGTCATGGTGACT-3';

reverse, 5'-CAGTTTTTTTCCGCTTCAGTTTATTT-3'.

**STAT1:**

forward, 5' - GCTGGGCGTCTATCCTGTGGT- 3';

reverse, 5' - GCTCAGCTGGTCTGCGTTCA- 3'.

**PD-L1:**

forward, 5'-GGCATTGCTGAACGCAT-3';

reverse, 5'- CAATTAGTGCAGCCAGGT-3.

**IDO-1:**

forward, 5'-TCACAGACCACAAGTCACAGC-3';

reverse, 5'-AGTTGGCAGTAAGGAACAGCA-3'.

**CXCL 10:**

forward, 5' - GAAATTATTCCTGCAAGCCAATTT -3';

reverse, 5'- TCACCCTTCTTTTTCATTGTAGCA -3'.

**CXCL 11:**

forward, 5'- CAGTTGTTCAAGGCTTCCCC -3';

reverse, 5'-TGCCACTTTCCTGCTTTTACC -3'.

**IRF1:**

forward, 5'- CCTGATACCTTCTCTGATGGACTCA -3';

reverse, 5'- TGCATGTAGCCTGGAAGTGTGT -3'.

**FASN:**

forward, 5'- CCAAGCAGGCACACACG -3';

reverse, 5'- GGAGTGAATCTGGGTTGATGC -3'.
