# Supplementary material for: N-cadherin inhibitor creates a microenvironment that protect TILs from immune checkpoints and Treg cells
Source: PubMed Central journal article supplement (PMC7949480; doi:10.1136/jitc-2020-002138), 2021-03-10

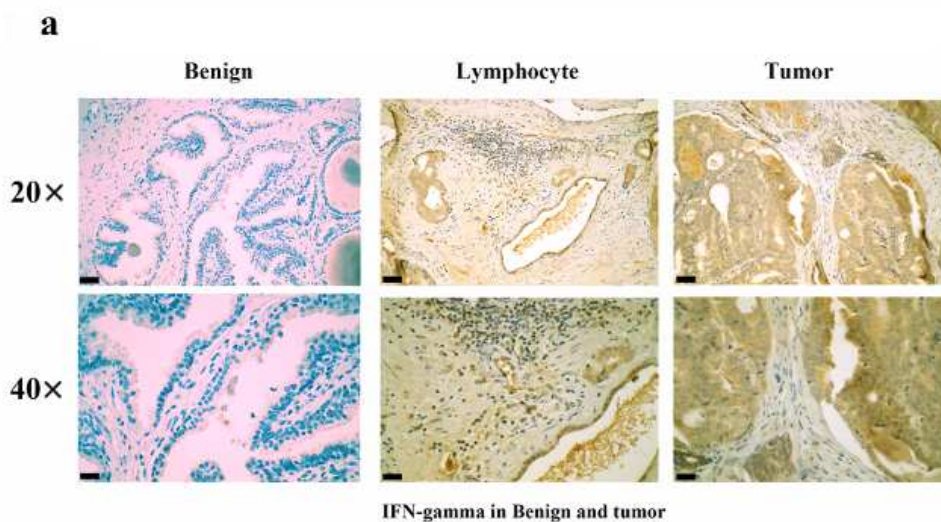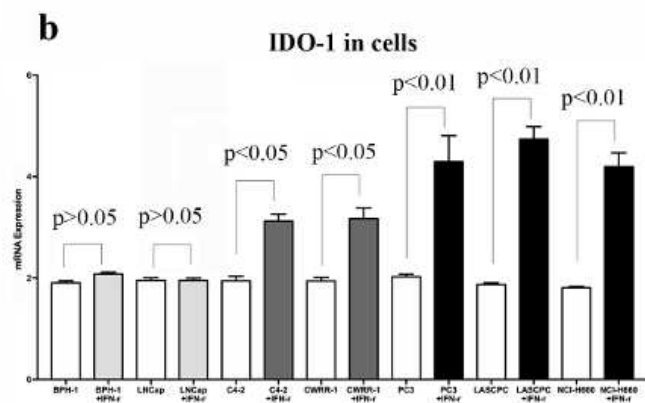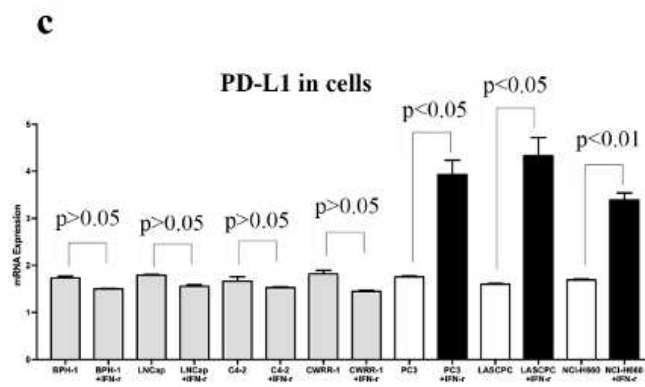

Supplement: jitc-2020-002138supp004.pdf [file jitc-2020-002138supp004.pdf]
